# Supplementary material for: Mechanism of the Fe(iii)-catalyzed synthesis of hexahydropyrimidine with α-phenylstyrene: a DFT study
Source: Royal Society of Chemistry journal article supplement (doi:10.1039/d2ra02727e), 2022-01-01
Supplement: d2ra02727e1.pdf [file d2ra02727e1.pdf]

Supporting Information

---

**Mechanism of Fe(III) Catalyzed Synthesis of Hexahydropyrimidine  
with  $\alpha$ -Phenylstyrene: A DFT study**

Yaxuan Cheng, Siwei Yang, Chaoyu Zhao, Huiling Liu\*

Laboratory of Theoretical and Computational Chemistry, Institute of Theoretical Chemistry,  
College of Chemistry, Jilin University, Liutiao Road 2, Changchun 130023, China

Corresponding author: huiling@jlu.edu.cn (HLL)

---

**Table of Contents**

Fig S1. The optimized representative structures in path 1. The important bond distances are shown in Å. The yellow, cyan-blue, green, purple, red, gray and white spheres represent sulfur atoms, iron atoms, fluorine atoms, nitrogen atoms, oxygen atoms, carbon atoms, hydrogen atoms, respectively. pp.1

Fig S2. The optimized representative structures in path 2. The important bond distances are in shown Å. The yellow, cyan-blue, green, purple, red, gray and white spheres represent sulfur atoms, iron atoms, fluorine atoms, nitrogen atoms, oxygen atoms, carbon atoms, hydrogen atoms, respectively. pp.2

Table S1. The Gibbs free energies (in Hartree) and coordinates of all structures, and values of imaginary frequencies (in  $\text{cm}^{-1}$ ) of all transition states. pp.3-58

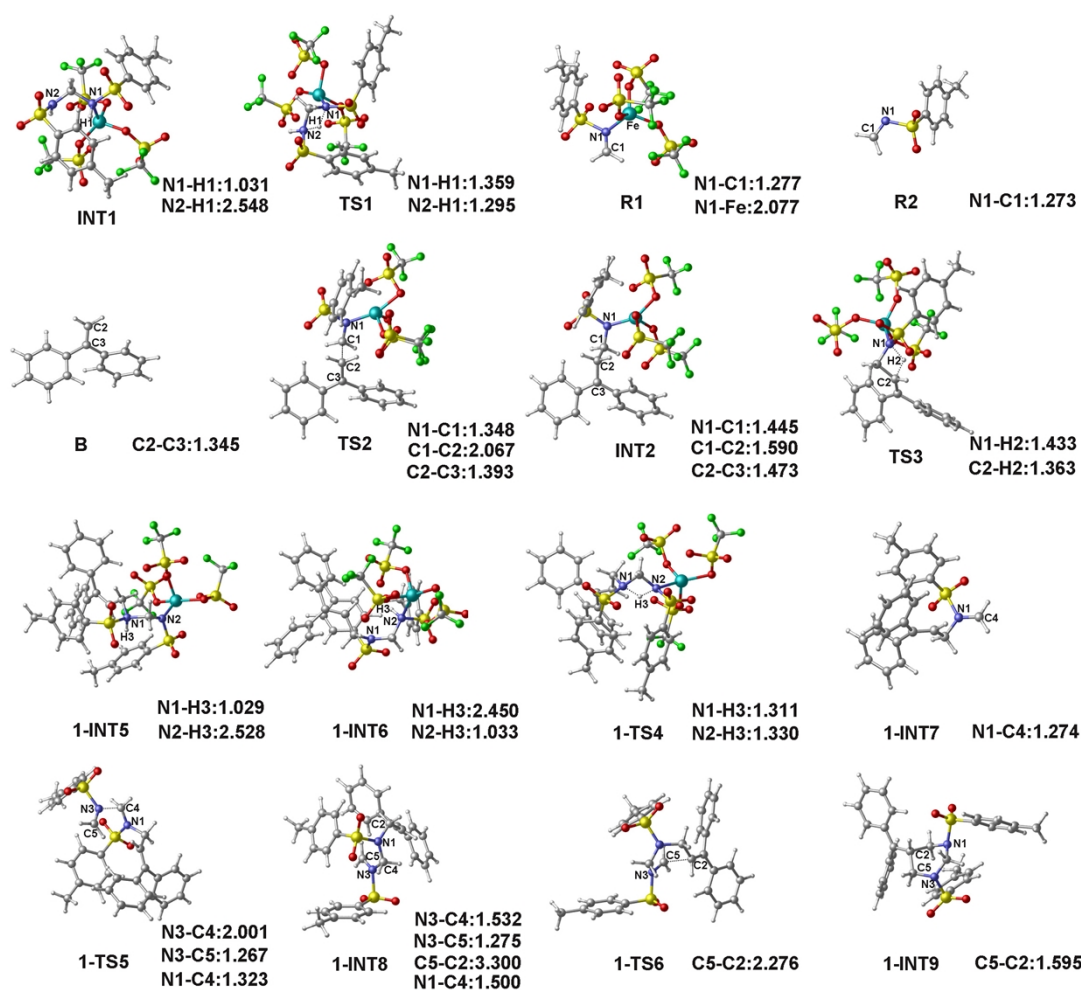

**Fig S1.** The optimized representative structures in path 1. The important bond distances are shown in Å. The yellow, cyan-blue, green, purple, red, gray and white spheres represent sulfur atoms, iron atoms, fluorine atoms, nitrogen atoms, oxygen atoms, carbon atoms, hydrogen atoms, respectively.

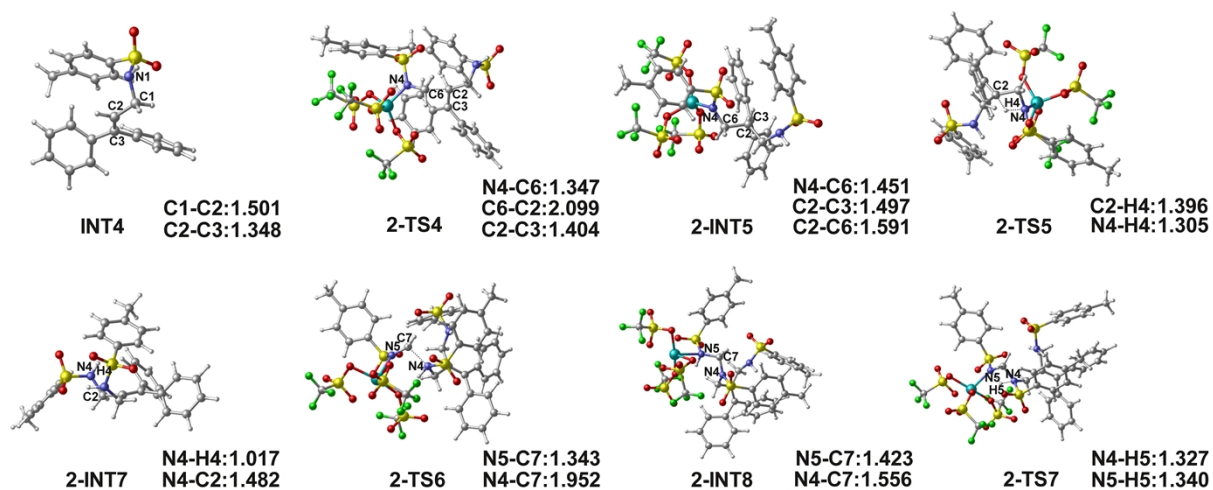

**Fig S2.** The optimized representative structures in path 2. The important bond distances are in shown Å. The yellow, cyan-blue, green, purple, red, gray and white spheres represent sulfur atoms, iron atoms, fluorine atoms, nitrogen atoms, oxygen atoms, carbon atoms, hydrogen atoms, respectively.

**Table S1.** The Gibbs free energies (in Hartree) and coordinates of all structures, and values of imaginary frequencies (in  $\text{cm}^{-1}$ ) of all transition states.

|   | A                     |             |             |
|---|-----------------------|-------------|-------------|
|   | Energy = -1789.279985 |             |             |
| C | 0.00009000            | 0.00179900  | -0.09487800 |
| H | 0.71669600            | 0.52315400  | 0.54928000  |
| H | -0.71594900           | -0.51964100 | 0.54983700  |
| S | -1.85444000           | 1.93101600  | -0.20332500 |
| O | -2.17162200           | 2.94558500  | -1.21015700 |
| O | -1.36586600           | 2.30681900  | 1.12927200  |
| C | -3.24056900           | 0.83320200  | 0.01625000  |
| C | -4.01900300           | 0.48913900  | -1.09147500 |
| C | -3.52359500           | 0.33481100  | 1.28484500  |
| C | -5.09119000           | -0.37530800 | -0.91453000 |
| H | -3.78595900           | 0.90324500  | -2.06584800 |
| C | -4.60349000           | -0.53375100 | 1.44175300  |
| H | -2.91110500           | 0.63452400  | 2.12724400  |
| C | -5.39786000           | -0.90208100 | 0.35118800  |
| H | -5.70570000           | -0.64696900 | -1.76813300 |
| H | -4.83244200           | -0.92772400 | 2.42727100  |
| C | -6.56114300           | -1.84570200 | 0.51875200  |
| H | -6.71059700           | -2.11472400 | 1.56689300  |
| H | -7.48873000           | -1.39757200 | 0.14728900  |
| H | -6.40063100           | -2.77026000 | -0.04684800 |
| N | -0.74136700           | 0.90438500  | -0.97130400 |
| H | -0.13549400           | 1.47580900  | -1.55857600 |
| S | 1.85279700            | -1.92908500 | -0.20490100 |
| O | 2.16880800            | -2.94327200 | -1.21248600 |
| O | 1.36393400            | -2.30533900 | 1.12747700  |
| C | 3.24017400            | -0.83298400 | 0.01536400  |
| C | 4.01785000            | -0.48762800 | -1.09252900 |
| C | 3.52472700            | -0.33695100 | 1.28450600  |
| C | 5.09089100            | 0.37560200  | -0.91510000 |
| H | 3.78325100            | -0.89946000 | -2.06749100 |
| C | 4.60559900            | 0.53035700  | 1.44192800  |
| H | 2.91239900            | -0.63714500 | 2.12685100  |
| C | 5.39946600            | 0.89958100  | 0.35134500  |
| H | 5.70452900            | 0.64865400  | -1.76889300 |
| H | 4.83553900            | 0.92280800  | 2.42781900  |
| C | 6.56617600            | 1.83880700  | 0.51987500  |
| H | 6.69341400            | 2.13597000  | 1.56332400  |
| H | 7.49847200            | 1.37233000  | 0.18397900  |
| H | 6.42776400            | 2.74776300  | -0.07575400 |

|                       |             |             |             |
|-----------------------|-------------|-------------|-------------|
| N                     | 0.74076200  | -0.90071600 | -0.97204500 |
| H                     | 0.13429800  | -1.47103900 | -1.55978100 |
| Fe(OTf) <sub>3</sub>  |             |             |             |
| Energy = -3008.917228 |             |             |             |
| Fe                    | 0.27525400  | -0.32152300 | -0.06670900 |
| O                     | 1.92396200  | -0.50626200 | -1.29230400 |
| S                     | 2.79114100  | -1.16240700 | -0.21334200 |
| O                     | 3.48917900  | -2.38531800 | -0.54262500 |
| O                     | 1.82305600  | -1.18284800 | 0.97616700  |
| O                     | -1.19642900 | -0.93176400 | 1.24131900  |
| S                     | -1.64801600 | -2.10453200 | 0.36517900  |
| O                     | -1.78573600 | -3.40634600 | 0.97925100  |
| O                     | -0.70484100 | -1.96539500 | -0.83324200 |
| O                     | -0.64200300 | 1.07240700  | -1.28409200 |
| S                     | -0.27514400 | 2.25900800  | -0.39015100 |
| O                     | 0.34712500  | 3.41290500  | -1.00152900 |
| O                     | 0.47108200  | 1.56046700  | 0.75044400  |
| C                     | -1.89839900 | 2.80553300  | 0.35962900  |
| C                     | 4.06229500  | 0.13634200  | 0.22962100  |
| C                     | -3.32562700 | -1.58769800 | -0.27904100 |
| F                     | -3.23245200 | -0.39039200 | -0.85100800 |
| F                     | -4.16802200 | -1.53675100 | 0.74627300  |
| F                     | -3.72937100 | -2.48705100 | -1.16692100 |
| F                     | 4.89164600  | 0.27496300  | -0.79734800 |
| F                     | 4.72086700  | -0.27745400 | 1.30526700  |
| F                     | 3.44806300  | 1.28681400  | 0.48164200  |
| F                     | -1.64666000 | 3.73915600  | 1.26842300  |
| F                     | -2.49817500 | 1.76381100  | 0.92845200  |
| F                     | -2.66112600 | 3.29564300  | -0.61043500 |
| INT1                  |             |             |             |
| Energy = -4798.22826  |             |             |             |
| C                     | -0.34350700 | 1.57938200  | -2.04254600 |
| H                     | -1.34591300 | 1.88976100  | -1.76110400 |
| H                     | -0.25931000 | 1.53576500  | -3.12825000 |
| S                     | 2.10668100  | 2.71979100  | -2.29941500 |
| O                     | 2.72771500  | 3.81969900  | -1.56661000 |
| O                     | 1.80945300  | 2.75997200  | -3.73051100 |
| C                     | 3.03943100  | 1.23197400  | -1.98580300 |
| C                     | 3.91675400  | 1.18830600  | -0.90451700 |
| C                     | 2.77806300  | 0.09208200  | -2.75369000 |
| C                     | 4.52153000  | -0.02189600 | -0.57570700 |
| H                     | 4.09551700  | 2.08412700  | -0.32198200 |
| C                     | 3.37290600  | -1.11480000 | -2.39326800 |
| H                     | 2.12457500  | 0.15307200  | -3.61836700 |

|    |             |             |             |
|----|-------------|-------------|-------------|
| C  | 4.24845500  | -1.19032100 | -1.29940300 |
| H  | 5.19291900  | -0.06723000 | 0.27637200  |
| H  | 3.14697100  | -2.00919100 | -2.96489800 |
| C  | 4.89858900  | -2.49807900 | -0.92954400 |
| H  | 5.81962600  | -2.64889300 | -1.50478200 |
| H  | 5.16037500  | -2.52441300 | 0.13086600  |
| H  | 4.23532000  | -3.33969700 | -1.14154000 |
| N  | 0.61372100  | 2.50099900  | -1.53774900 |
| H  | 0.61313400  | 2.71615300  | -0.54732300 |
| S  | -0.79684000 | -1.13403300 | -2.57416800 |
| O  | 0.10425100  | -2.25836900 | -2.34982600 |
| O  | -0.93553300 | -0.49984100 | -3.88513100 |
| C  | -2.39111900 | -1.44456100 | -1.88341900 |
| C  | -2.56042200 | -2.52009700 | -1.01117300 |
| C  | -3.43982300 | -0.57803400 | -2.20460900 |
| C  | -3.79829000 | -2.68351000 | -0.39740300 |
| H  | -1.74651100 | -3.20086000 | -0.80463700 |
| C  | -4.66692100 | -0.76847500 | -1.58442800 |
| H  | -3.29324900 | 0.21775400  | -2.92535100 |
| C  | -4.85647600 | -1.80228900 | -0.65298800 |
| H  | -3.93146300 | -3.50293500 | 0.30154500  |
| H  | -5.48871200 | -0.09697100 | -1.81243700 |
| C  | -6.16830600 | -1.93279300 | 0.07305100  |
| H  | -7.01620400 | -1.81107500 | -0.60777100 |
| H  | -6.25880100 | -2.90053900 | 0.57107600  |
| H  | -6.25009900 | -1.15265700 | 0.83908600  |
| N  | -0.14382400 | 0.16409100  | -1.48992700 |
| H  | 0.86752200  | -0.03382600 | -1.52759100 |
| O  | -0.21849100 | -1.87859000 | 0.67353800  |
| S  | 0.09662300  | -3.15449100 | 1.54692500  |
| O  | 0.20147000  | -2.81624400 | 2.95564400  |
| O  | -0.74130500 | -4.25385500 | 1.08359700  |
| C  | 1.82388900  | -3.46073200 | 0.91521300  |
| O  | -2.41189000 | 0.12109500  | 1.16723000  |
| S  | -2.47878500 | 1.64026100  | 1.41255200  |
| O  | -2.83420500 | 2.06945300  | 2.74936000  |
| O  | -1.20471400 | 2.14319300  | 0.78586800  |
| C  | -3.85440600 | 2.23359800  | 0.29944600  |
| Fe | -0.44685400 | -0.05314100 | 0.64896100  |
| O  | 0.28882900  | 0.40847100  | 2.68953600  |
| S  | 1.68406700  | 0.72343700  | 2.19847100  |
| O  | 2.81318200  | 0.04836200  | 2.80510200  |
| O  | 1.53297700  | 0.60272900  | 0.67576500  |
| C  | 1.97170700  | 2.55579900  | 2.44456500  |

|                                                     |             |             |             |
|-----------------------------------------------------|-------------|-------------|-------------|
| F                                                   | 3.23482100  | 2.81780400  | 2.11179200  |
| F                                                   | 1.75878700  | 2.86035200  | 3.71737400  |
| F                                                   | 1.15484500  | 3.26445400  | 1.66497400  |
| F                                                   | -4.08194700 | 3.51405900  | 0.56216800  |
| F                                                   | -4.95173000 | 1.51670400  | 0.53166600  |
| F                                                   | -3.50183700 | 2.10595200  | -0.98631800 |
| F                                                   | 1.79673900  | -3.68828900 | -0.39731100 |
| F                                                   | 2.33121500  | -4.51786800 | 1.54467300  |
| F                                                   | 2.57789100  | -2.38691200 | 1.16285600  |
| TS1                                                 |             |             |             |
| Energy = -4798.178729, Lowest Freq $\nu$ = -1676.83 |             |             |             |
| C                                                   | -0.28064600 | -0.37040800 | -2.12143700 |
| H                                                   | 0.71849900  | -0.71335100 | -2.37467200 |
| H                                                   | -0.70808100 | 0.25459400  | -2.90484100 |
| S                                                   | -2.66042000 | -1.80206400 | -2.75500500 |
| O                                                   | -2.95062200 | -3.20340300 | -2.47438000 |
| O                                                   | -2.37282600 | -1.29621800 | -4.09358800 |
| C                                                   | -3.78880800 | -0.73034800 | -1.92374100 |
| C                                                   | -4.26920300 | -1.11237300 | -0.66742200 |
| C                                                   | -4.11038100 | 0.49879100  | -2.49848600 |
| C                                                   | -5.06879700 | -0.22074800 | 0.03207900  |
| H                                                   | -4.00911100 | -2.07780900 | -0.24959900 |
| C                                                   | -4.92584200 | 1.36802600  | -1.78143100 |
| H                                                   | -3.71533000 | 0.76787200  | -3.46998300 |
| C                                                   | -5.39431900 | 1.03420300  | -0.50537100 |
| H                                                   | -5.43036300 | -0.48944500 | 1.01954600  |
| H                                                   | -5.17489300 | 2.33453200  | -2.20764900 |
| C                                                   | -6.18214700 | 2.02579500  | 0.30655500  |
| H                                                   | -6.71120200 | 2.73963900  | -0.32986100 |
| H                                                   | -6.91001200 | 1.52967200  | 0.95427800  |
| H                                                   | -5.50047300 | 2.59454600  | 0.95027600  |
| N                                                   | -1.19078600 | -1.51130400 | -1.77955800 |
| H                                                   | -0.70720600 | -2.39965500 | -1.61826900 |
| S                                                   | -1.20516600 | 1.79826200  | -0.70418500 |
| O                                                   | -2.32060700 | 1.56296700  | 0.21134000  |
| O                                                   | -1.43476300 | 2.19208700  | -2.10127300 |
| C                                                   | -0.09545400 | 2.95539200  | 0.05153100  |
| C                                                   | -0.11500900 | 3.10565400  | 1.44010500  |
| C                                                   | 0.76346400  | 3.70353600  | -0.75421500 |
| C                                                   | 0.79066400  | 3.98274100  | 2.02634500  |
| H                                                   | -0.81556100 | 2.54561300  | 2.04311000  |
| C                                                   | 1.65529000  | 4.57855100  | -0.14551200 |
| H                                                   | 0.72601400  | 3.60079000  | -1.83054800 |
| C                                                   | 1.69804600  | 4.71599700  | 1.24929700  |

|                       |             |             |             |
|-----------------------|-------------|-------------|-------------|
| H                     | 0.79187600  | 4.09491500  | 3.10615900  |
| H                     | 2.33353100  | 5.16107100  | -0.76120200 |
| C                     | 2.71208000  | 5.61854200  | 1.90140400  |
| H                     | 3.00586000  | 6.43714100  | 1.23900200  |
| H                     | 2.32799600  | 6.04555400  | 2.83165800  |
| H                     | 3.61856300  | 5.05381000  | 2.15021000  |
| N                     | -0.34675400 | 0.26555900  | -0.77891400 |
| H                     | -1.20981200 | -0.78214000 | -0.70946700 |
| O                     | 0.09132000  | 0.27709200  | 2.08772100  |
| S                     | -0.54583300 | -0.34248500 | 3.38686800  |
| O                     | 0.10686600  | -1.58986300 | 3.75120800  |
| O                     | -0.77119100 | 0.72605900  | 4.34960100  |
| C                     | -2.22695100 | -0.81468900 | 2.71765300  |
| O                     | 2.55171300  | 1.11427900  | 0.34847300  |
| S                     | 3.40928500  | 0.46885000  | -0.75745000 |
| O                     | 4.82428900  | 0.34424300  | -0.46980400 |
| O                     | 2.62317000  | -0.72994900 | -1.19246100 |
| C                     | 3.26197300  | 1.64092200  | -2.19812500 |
| Fe                    | 1.08524800  | -0.26000600 | 0.60271300  |
| O                     | 2.38657800  | -1.67905800 | 1.57980800  |
| S                     | 1.67088800  | -2.91100900 | 1.06082100  |
| O                     | 1.32808800  | -3.97151400 | 1.98370400  |
| O                     | 0.52016600  | -2.30177800 | 0.24265400  |
| C                     | 2.82058900  | -3.67037100 | -0.24338300 |
| F                     | 2.95253400  | -4.96436400 | 0.02758600  |
| F                     | 4.00354500  | -3.07726300 | -0.19750400 |
| F                     | 2.27502200  | -3.52730800 | -1.45160100 |
| F                     | 4.03303600  | 1.19204000  | -3.18378100 |
| F                     | 3.64607100  | 2.86402600  | -1.84417400 |
| F                     | 1.98935200  | 1.67672900  | -2.62387300 |
| F                     | -2.99460000 | 0.25907000  | 2.56709900  |
| F                     | -2.80179400 | -1.65544200 | 3.57554700  |
| F                     | -2.09302700 | -1.43600800 | 1.53122800  |
| R1                    |             |             |             |
| Energy = -3922.626258 |             |             |             |
| S                     | 2.26760600  | -1.49304900 | -2.12679200 |
| O                     | 2.51477300  | -1.49816900 | -3.56806400 |
| O                     | 2.38403300  | -2.68796400 | -1.30436200 |
| C                     | 2.99811600  | -0.10181400 | -1.34157900 |
| C                     | 3.48671700  | -0.24603500 | -0.03990000 |
| C                     | 3.01042600  | 1.12552200  | -2.01453300 |
| C                     | 3.98179800  | 0.88405000  | 0.60021900  |
| H                     | 3.45528900  | -1.20838700 | 0.45694200  |
| C                     | 3.50019500  | 2.23748000  | -1.34518500 |



|                       |             |             |             |
|-----------------------|-------------|-------------|-------------|
| H                     | 2.63719400  | 1.20371900  | -3.02944100 |
| C                     | 3.97823600  | 2.13699800  | -0.02739400 |
| H                     | 4.34537800  | 0.79705700  | 1.61862200  |
| H                     | 3.49002500  | 3.20430100  | -1.83655400 |
| C                     | 4.40999700  | 3.36733700  | 0.71875000  |
| H                     | 3.53755300  | 3.80682300  | 1.21486900  |
| H                     | 5.14861400  | 3.13166000  | 1.48883300  |
| H                     | 4.82744100  | 4.12163400  | 0.04700300  |
| N                     | 0.50543300  | -1.01665400 | -1.96978300 |
| Fe                    | -0.17834100 | -0.26473000 | -0.15900900 |
| O                     | 1.27371400  | 2.24569100  | 1.65647500  |
| S                     | 0.46473100  | 2.73854600  | 0.54957800  |
| O                     | 0.87739500  | 3.89587700  | -0.22968300 |
| O                     | 0.06141100  | 1.56400600  | -0.43314300 |
| C                     | -1.22122900 | 3.09330000  | 1.25887300  |
| F                     | -1.70719200 | 1.96556500  | 1.79490100  |
| F                     | -2.04446900 | 3.51966500  | 0.30406000  |
| F                     | -1.10492900 | 4.02106900  | 2.20312600  |
| C                     | -0.18354700 | -1.09317900 | -3.04266700 |
| H                     | -1.25337400 | -0.88850800 | -3.00821400 |
| H                     | 0.29986500  | -1.39015200 | -3.97654900 |
| O                     | 0.79832800  | -0.91335800 | 1.24160700  |
| S                     | 1.01995100  | -2.17511700 | 2.17648600  |
| O                     | 0.55352100  | -1.87999200 | 3.51880200  |
| O                     | 2.34939300  | -2.71002200 | 1.92201700  |
| C                     | -0.21469500 | -3.36576900 | 1.41673800  |
| F                     | -0.22592700 | -3.20998200 | 0.07767500  |
| F                     | 0.14442100  | -4.60718800 | 1.70959200  |
| F                     | -1.42927100 | -3.11214500 | 1.88724500  |
| O                     | -1.97442400 | -0.68516100 | 0.10276500  |
| S                     | -3.30417100 | -0.90273500 | -0.70241200 |
| O                     | -4.27703300 | -1.60618400 | 0.11021900  |
| O                     | -3.00336700 | -1.34472300 | -2.06740600 |
| C                     | -3.84740100 | 0.86995700  | -0.86399700 |
| F                     | -2.88923200 | 1.54945200  | -1.51290500 |
| F                     | -4.03707600 | 1.40751600  | 0.33559200  |
| F                     | -4.97439300 | 0.91627300  | -1.56732300 |
| TsNH <sub>2</sub>     |             |             |             |
| Energy = -875.6002024 |             |             |             |
| S                     | 1.89489500  | 0.02660400  | -0.13768800 |
| O                     | 2.33819000  | -1.15771100 | -0.87902100 |
| O                     | 2.31656000  | 1.38203500  | -0.50742600 |
| C                     | 0.11211100  | 0.01563900  | -0.07609100 |
| C                     | -0.56309700 | -1.20566100 | -0.07023200 |

|                       |             |             |             |
|-----------------------|-------------|-------------|-------------|
| C                     | -1.95211300 | -1.20613500 | -0.02138000 |
| C                     | -2.67673000 | -0.00514600 | 0.02028500  |
| C                     | -1.97157500 | 1.20346100  | 0.00090900  |
| C                     | -0.57878600 | 1.22397200  | -0.04767600 |
| H                     | -0.00370700 | -2.13274600 | -0.12101200 |
| H                     | -2.48653900 | -2.15188800 | -0.02305300 |
| H                     | -2.51893900 | 2.14134600  | 0.01689200  |
| H                     | -0.02939700 | 2.15755500  | -0.08151000 |
| C                     | -4.18218500 | -0.02408900 | 0.09674600  |
| H                     | -4.60839900 | 0.94743900  | -0.16533700 |
| H                     | -4.60517700 | -0.77593900 | -0.57631800 |
| H                     | -4.51835200 | -0.27127400 | 1.11073100  |
| N                     | 2.33640600  | -0.25457700 | 1.47709800  |
| H                     | 3.05597900  | -0.97333700 | 1.48612800  |
| H                     | 2.67762000  | 0.60838000  | 1.89301600  |
| R2                    |             |             |             |
| Energy = -913.68023   |             |             |             |
| S                     | 1.66336900  | 0.16550100  | -0.41408200 |
| O                     | 2.13139200  | -1.07764400 | -1.04673000 |
| O                     | 2.02447500  | 1.47271300  | -0.96400600 |
| C                     | -0.10156900 | 0.07295300  | -0.21264900 |
| C                     | -0.80441200 | 1.22574100  | 0.14157700  |
| C                     | -0.75064300 | -1.14278300 | -0.41587600 |
| C                     | -2.18311500 | 1.14637100  | 0.30070000  |
| H                     | -0.27550400 | 2.16246900  | 0.27393000  |
| C                     | -2.13298000 | -1.20027000 | -0.25535800 |
| H                     | -0.17710200 | -2.01487200 | -0.70769400 |
| C                     | -2.86639600 | -0.06405100 | 0.10882500  |
| H                     | -2.74195300 | 2.03755000  | 0.57128400  |
| H                     | -2.65158200 | -2.14005000 | -0.42049700 |
| C                     | -4.35830800 | -0.13904800 | 0.30979100  |
| H                     | -4.60299900 | -0.22927700 | 1.37490800  |
| H                     | -4.85579200 | 0.76144100  | -0.06177400 |
| H                     | -4.78795700 | -1.00403200 | -0.20163300 |
| N                     | 2.14865800  | 0.22531400  | 1.26336300  |
| C                     | 2.95832900  | -0.69579800 | 1.60380900  |
| H                     | 3.32801300  | -0.69358500 | 2.62978300  |
| H                     | 3.29800000  | -1.48410300 | 0.92443300  |
| B                     |             |             |             |
| Energy = -540.7338557 |             |             |             |
| C                     | 0.00023700  | 2.50382100  | -0.00014200 |
| H                     | -0.92119500 | 3.06931100  | 0.08529000  |
| H                     | 0.92196100  | 3.06878700  | -0.08583100 |
| C                     | -0.00004000 | 1.15921200  | 0.00024600  |

|                                                    |             |             |             |
|----------------------------------------------------|-------------|-------------|-------------|
| C                                                  | 1.27523500  | 0.39571800  | -0.04053500 |
| C                                                  | 1.38531100  | -0.77650800 | -0.80598900 |
| C                                                  | 2.40404500  | 0.83988500  | 0.66517100  |
| C                                                  | 2.59178100  | -1.46851200 | -0.88026800 |
| H                                                  | 0.51935100  | -1.13668500 | -1.35115600 |
| C                                                  | 3.61043000  | 0.14675800  | 0.59277500  |
| H                                                  | 2.32139200  | 1.72374200  | 1.28933200  |
| C                                                  | 3.70985700  | -1.00921300 | -0.18236000 |
| H                                                  | 2.65946500  | -2.36767100 | -1.48531000 |
| H                                                  | 4.47047000  | 0.50328700  | 1.15171500  |
| H                                                  | 4.64837500  | -1.55243400 | -0.23547900 |
| C                                                  | -1.27531900 | 0.39586600  | 0.04087100  |
| C                                                  | -1.38553300 | -0.77633000 | 0.80641600  |
| C                                                  | -2.40389400 | 0.83997200  | -0.66519700 |
| C                                                  | -2.59201000 | -1.46830300 | 0.88033400  |
| H                                                  | -0.51980600 | -1.13600900 | 1.35234900  |
| C                                                  | -3.61030200 | 0.14681600  | -0.59315600 |
| H                                                  | -2.32096100 | 1.72373600  | -1.28944900 |
| C                                                  | -3.70988400 | -1.00910000 | 0.18195200  |
| H                                                  | -2.66005700 | -2.36734300 | 1.48551100  |
| H                                                  | -4.47017900 | 0.50329400  | -1.15237600 |
| H                                                  | -4.64831000 | -1.55251800 | 0.23468900  |
| TS2                                                |             |             |             |
| Energy = -4463.357063, Lowest Freq $\nu$ = -312.70 |             |             |             |
| S                                                  | -0.10005100 | 2.87959300  | -1.77794300 |
| O                                                  | -1.42920300 | 3.51232600  | -1.75412200 |
| O                                                  | 0.73282400  | 2.92993700  | -2.97443200 |
| C                                                  | 0.83251800  | 3.40882100  | -0.36625200 |
| C                                                  | 2.22494900  | 3.45870600  | -0.45513900 |
| C                                                  | 0.16333900  | 3.74488800  | 0.81502600  |
| C                                                  | 2.95459700  | 3.80294100  | 0.67847900  |
| H                                                  | 2.71555800  | 3.21857600  | -1.38889000 |
| C                                                  | 0.91246100  | 4.09465100  | 1.92987600  |
| H                                                  | -0.91833500 | 3.73805500  | 0.85611700  |
| C                                                  | 2.31453200  | 4.10511500  | 1.88622300  |
| H                                                  | 4.03830100  | 3.80675600  | 0.62595400  |
| H                                                  | 0.40407600  | 4.33208900  | 2.85891800  |
| C                                                  | 3.11203200  | 4.36520200  | 3.13403000  |
| H                                                  | 3.24075800  | 3.42209300  | 3.67795500  |
| H                                                  | 4.10590800  | 4.75793000  | 2.90458800  |
| H                                                  | 2.60310600  | 5.06704700  | 3.80064800  |
| N                                                  | -0.36735000 | 1.19559600  | -1.39391900 |
| Fe                                                 | 1.03063100  | -0.05869000 | -0.67266600 |
| O                                                  | 1.95691200  | 1.13915400  | 2.44467600  |

|   |             |             |             |
|---|-------------|-------------|-------------|
| S | 0.69648800  | 0.40852500  | 2.48676100  |
| O | -0.47483500 | 0.99151700  | 3.14310800  |
| O | 0.27732700  | -0.13953500 | 1.09067500  |
| C | 1.04854300  | -1.19556100 | 3.36204900  |
| F | 1.92265300  | -1.91859300 | 2.66593200  |
| F | -0.08585300 | -1.89275400 | 3.50929700  |
| F | 1.55184800  | -0.92267100 | 4.56621000  |
| C | -1.65231500 | 0.78902800  | -1.43332300 |
| H | -1.80790700 | -0.28504100 | -1.37956200 |
| H | -2.34332200 | 1.35722200  | -2.04925600 |
| C | -2.54221900 | 1.30944000  | 0.35814900  |
| H | -1.74236000 | 0.91395900  | 0.96835600  |
| H | -2.56317300 | 2.38373500  | 0.22824700  |
| C | -3.73384400 | 0.59373300  | 0.25643000  |
| C | -4.91576300 | 1.21201400  | -0.35496700 |
| C | -6.21028100 | 0.73812900  | -0.05328700 |
| C | -4.79255700 | 2.32718100  | -1.21416300 |
| C | -7.33554500 | 1.34460000  | -0.60099700 |
| H | -6.32616800 | -0.08883400 | 0.63689600  |
| C | -5.92088400 | 2.91745600  | -1.77126200 |
| H | -3.81644200 | 2.73412300  | -1.45493900 |
| C | -7.19486100 | 2.42891400  | -1.46938500 |
| H | -8.32338700 | 0.97400200  | -0.34660200 |
| H | -5.80554100 | 3.76301600  | -2.44159300 |
| H | -8.07339100 | 2.89670900  | -1.90279900 |
| C | -3.74987700 | -0.81656200 | 0.66093200  |
| C | -2.96576100 | -1.25569900 | 1.74832600  |
| C | -4.46037200 | -1.77338000 | -0.09355400 |
| C | -2.90259400 | -2.60609900 | 2.06709000  |
| H | -2.42374100 | -0.53630200 | 2.35189300  |
| C | -4.38066900 | -3.12432800 | 0.22357000  |
| H | -5.02862000 | -1.45680700 | -0.96023100 |
| C | -3.60253000 | -3.54377700 | 1.30301000  |
| H | -2.29449200 | -2.92860700 | 2.90413400  |
| H | -4.90679300 | -3.85170200 | -0.38580100 |
| H | -3.53288000 | -4.59986100 | 1.54408800  |
| O | 2.55483500  | 0.74821700  | -1.78123800 |
| S | 3.70920500  | 0.20001900  | -0.93144300 |
| O | 2.98356700  | -0.55354500 | 0.15799800  |
| O | 4.75517800  | 1.13823900  | -0.56867000 |
| C | 4.48282500  | -1.10783200 | -2.01542600 |
| F | 5.01759600  | -0.51778800 | -3.08079500 |
| F | 5.42938200  | -1.72822600 | -1.31461500 |
| F | 3.55562700  | -1.97984400 | -2.39607400 |

|                       |             |             |             |
|-----------------------|-------------|-------------|-------------|
| O                     | 0.72486200  | -1.71815000 | -1.51427500 |
| S                     | -0.33218200 | -2.85777700 | -1.62965200 |
| O                     | -0.04460500 | -3.70422600 | -2.77548600 |
| O                     | -1.68452700 | -2.33750300 | -1.41311100 |
| C                     | 0.09021100  | -3.84359500 | -0.11002600 |
| F                     | -0.01034600 | -3.07228100 | 0.97633400  |
| F                     | 1.33340200  | -4.31095300 | -0.20231900 |
| F                     | -0.76717300 | -4.86161400 | -0.00379100 |
| INT2                  |             |             |             |
| Energy = -4463.377476 |             |             |             |
| S                     | -0.17812300 | 2.90700700  | -1.69478000 |
| O                     | -1.52695200 | 3.50585400  | -1.61613400 |
| O                     | 0.59586000  | 3.01799300  | -2.92876600 |
| C                     | 0.79400100  | 3.48559100  | -0.32744000 |
| C                     | 2.18481400  | 3.47206500  | -0.43489700 |
| C                     | 0.15732300  | 3.85835000  | 0.85950800  |
| C                     | 2.94601600  | 3.78490300  | 0.68793500  |
| H                     | 2.65238400  | 3.20718800  | -1.37422500 |
| C                     | 0.93649000  | 4.18646000  | 1.96038200  |
| H                     | -0.92434800 | 3.89245900  | 0.91165900  |
| C                     | 2.33659000  | 4.12525600  | 1.90085600  |
| H                     | 4.02757400  | 3.73287000  | 0.61984800  |
| H                     | 0.45370900  | 4.46038900  | 2.89350500  |
| C                     | 3.15959300  | 4.34911400  | 3.13964300  |
| H                     | 3.22551100  | 3.40950600  | 3.70075800  |
| H                     | 4.17698900  | 4.66701900  | 2.89769800  |
| H                     | 2.70662100  | 5.09702600  | 3.79695400  |
| N                     | -0.35069100 | 1.25788200  | -1.29576100 |
| Fe                    | 1.02456800  | 0.03877200  | -0.70344300 |
| O                     | 1.67640200  | 1.19623000  | 2.52032800  |
| S                     | 0.53440900  | 0.29123100  | 2.47790400  |
| O                     | -0.73727200 | 0.70458600  | 3.09023200  |
| O                     | 0.26239900  | -0.30107500 | 1.08267700  |
| C                     | 1.05086900  | -1.25123000 | 3.37732100  |
| F                     | 2.03959700  | -1.85917500 | 2.72557800  |
| F                     | 0.00712200  | -2.09238100 | 3.47501400  |
| F                     | 1.45789500  | -0.92857800 | 4.60623500  |
| C                     | -1.71391600 | 0.78288800  | -1.23033300 |
| H                     | -1.70997300 | -0.30457900 | -1.30356700 |
| H                     | -2.30218400 | 1.17970600  | -2.06177000 |
| C                     | -2.42194000 | 1.18553600  | 0.13493600  |
| H                     | -1.76603500 | 0.83753800  | 0.92942100  |
| H                     | -2.51561500 | 2.26709500  | 0.17624000  |
| C                     | -3.72273900 | 0.49525100  | 0.16342500  |

|                                                     |             |             |             |
|-----------------------------------------------------|-------------|-------------|-------------|
| C                                                   | -4.89014800 | 1.16999200  | -0.34508600 |
| C                                                   | -6.19427000 | 0.73265500  | 0.00280900  |
| C                                                   | -4.75297900 | 2.32008100  | -1.16786200 |
| C                                                   | -7.31236300 | 1.39599400  | -0.47976900 |
| H                                                   | -6.31022900 | -0.09689900 | 0.68954700  |
| C                                                   | -5.87962900 | 2.95961000  | -1.66321400 |
| H                                                   | -3.77026000 | 2.69557400  | -1.43357100 |
| C                                                   | -7.15725400 | 2.50115400  | -1.32337200 |
| H                                                   | -8.30453500 | 1.06479200  | -0.19218500 |
| H                                                   | -5.76443400 | 3.82301400  | -2.30954300 |
| H                                                   | -8.03402700 | 3.01675200  | -1.70296500 |
| C                                                   | -3.74360400 | -0.88879000 | 0.55560400  |
| C                                                   | -2.84408700 | -1.36995900 | 1.54252300  |
| C                                                   | -4.56190200 | -1.82165100 | -0.13727500 |
| C                                                   | -2.77897500 | -2.72390800 | 1.82500700  |
| H                                                   | -2.23628200 | -0.67717100 | 2.11190500  |
| C                                                   | -4.46189300 | -3.17607100 | 0.13341000  |
| H                                                   | -5.19527800 | -1.47750700 | -0.94572200 |
| C                                                   | -3.57051700 | -3.62891900 | 1.11157300  |
| H                                                   | -2.08733600 | -3.07572500 | 2.58016100  |
| H                                                   | -5.04980700 | -3.88577600 | -0.43834300 |
| H                                                   | -3.48077100 | -4.69289700 | 1.30644800  |
| O                                                   | 2.54467800  | 0.74093600  | -1.98916000 |
| S                                                   | 3.69152700  | 0.37126300  | -1.05788500 |
| O                                                   | 2.97559600  | -0.18578400 | 0.15548700  |
| O                                                   | 4.73205500  | 1.36470200  | -0.85160100 |
| C                                                   | 4.50474200  | -1.10347300 | -1.85884200 |
| F                                                   | 5.04265600  | -0.72311200 | -3.01554100 |
| F                                                   | 5.45743700  | -1.55597700 | -1.04417400 |
| F                                                   | 3.60481500  | -2.05843700 | -2.07118400 |
| O                                                   | 0.75485300  | -1.68898200 | -1.49578300 |
| S                                                   | -0.27618700 | -2.83108300 | -1.62330300 |
| O                                                   | -0.03538300 | -3.62687500 | -2.81761400 |
| O                                                   | -1.63852500 | -2.37438400 | -1.32164300 |
| C                                                   | 0.21384100  | -3.89501000 | -0.17998200 |
| F                                                   | 0.19576900  | -3.18713500 | 0.95440100  |
| F                                                   | 1.43536000  | -4.39107800 | -0.36438800 |
| F                                                   | -0.66505900 | -4.90070900 | -0.06913200 |
| TS3                                                 |             |             |             |
| Energy = -4463.323283, Lowest Freq $\nu$ = -1674.30 |             |             |             |
| S                                                   | 0.05160900  | 1.87002800  | -2.90250400 |
| O                                                   | -1.15057900 | 2.64602300  | -3.23139000 |
| O                                                   | 0.81191900  | 1.21470100  | -3.96782200 |
| C                                                   | 1.13573400  | 2.78306900  | -1.85138600 |

|    |             |             |             |
|----|-------------|-------------|-------------|
| C  | 2.48730400  | 2.85979700  | -2.18793300 |
| C  | 0.62786600  | 3.36585800  | -0.68662000 |
| C  | 3.34905600  | 3.52035300  | -1.31993700 |
| H  | 2.85061600  | 2.37939100  | -3.08842200 |
| C  | 1.51324600  | 4.00143400  | 0.17396100  |
| H  | -0.42316000 | 3.29414400  | -0.43725200 |
| C  | 2.88265800  | 4.07992500  | -0.12124700 |
| H  | 4.40739100  | 3.56388200  | -1.55399200 |
| H  | 1.13969600  | 4.42857200  | 1.09908900  |
| C  | 3.84340600  | 4.69859600  | 0.85627000  |
| H  | 4.25016300  | 3.91319500  | 1.50306500  |
| H  | 4.68230500  | 5.17805100  | 0.34454300  |
| H  | 3.35007200  | 5.44025300  | 1.48998200  |
| N  | -0.48016300 | 0.61482000  | -1.80038900 |
| Fe | 0.83096500  | -0.22563000 | -0.57771400 |
| O  | -1.36918700 | 1.72355200  | 1.13538000  |
| S  | -1.04316600 | 0.49787400  | 1.87445700  |
| O  | -2.09239400 | -0.19938500 | 2.60788900  |
| O  | -0.25249600 | -0.50167400 | 0.98112000  |
| C  | 0.27406900  | 0.96756700  | 3.10589300  |
| F  | 1.19908300  | 1.71457300  | 2.50412200  |
| F  | 0.83877800  | -0.13069800 | 3.60228400  |
| F  | -0.29435400 | 1.66752600  | 4.08796600  |
| C  | -1.65426600 | -0.15794100 | -2.40470800 |
| H  | -1.56067800 | -1.21660200 | -2.17855800 |
| H  | -1.68504300 | -0.03374200 | -3.48859100 |
| C  | -2.72311900 | 0.61444600  | -1.65478400 |
| H  | -1.60045800 | 1.07889200  | -1.03707500 |
| H  | -2.90153500 | 1.59645300  | -2.09464400 |
| C  | -3.67858700 | 0.18184700  | -0.72983000 |
| C  | -4.55792500 | 1.21151900  | -0.15448000 |
| C  | -4.83836300 | 1.18454100  | 1.22658300  |
| C  | -5.08781500 | 2.25113300  | -0.94172400 |
| C  | -5.61254900 | 2.18671200  | 1.80144100  |
| H  | -4.40055400 | 0.40813300  | 1.84247500  |
| C  | -5.88192600 | 3.23551500  | -0.36373000 |
| H  | -4.91112700 | 2.26186200  | -2.01203800 |
| C  | -6.13954100 | 3.20930500  | 1.00943900  |
| H  | -5.80094600 | 2.17221300  | 2.87001500  |
| H  | -6.30345700 | 4.02056400  | -0.98308300 |
| H  | -6.75234100 | 3.98403100  | 1.45994500  |
| C  | -3.87011000 | -1.19515800 | -0.26817300 |
| C  | -2.81546100 | -2.10517600 | -0.07738200 |
| C  | -5.19151000 | -1.63680500 | -0.02982900 |

|                       |             |             |             |
|-----------------------|-------------|-------------|-------------|
| C                     | -3.06767800 | -3.41075000 | 0.32393600  |
| H                     | -1.79343900 | -1.78874600 | -0.18698900 |
| C                     | -5.44114100 | -2.94984500 | 0.34962400  |
| H                     | -6.01686700 | -0.95044700 | -0.17785700 |
| C                     | -4.37965800 | -3.84012500 | 0.52992000  |
| H                     | -2.23523300 | -4.08758400 | 0.47429000  |
| H                     | -6.46324900 | -3.27868200 | 0.50717400  |
| H                     | -4.57492200 | -4.86366300 | 0.83433300  |
| O                     | 2.35077000  | 0.69112100  | -0.05910200 |
| S                     | 3.83578500  | 0.57739000  | 0.42680100  |
| O                     | 4.03092200  | 1.43933200  | 1.58622600  |
| O                     | 4.74905700  | 0.62451700  | -0.70579500 |
| C                     | 3.86278900  | -1.17979600 | 1.07715000  |
| F                     | 4.05066200  | -2.03845500 | 0.08134000  |
| F                     | 4.84772000  | -1.29377000 | 1.96326300  |
| F                     | 2.69299100  | -1.45360200 | 1.68032400  |
| O                     | 1.47592200  | -1.86851200 | -1.22989200 |
| S                     | 0.86864800  | -3.26434800 | -1.58526800 |
| O                     | 1.76268000  | -4.00692700 | -2.45447300 |
| O                     | -0.55686000 | -3.13968100 | -1.89996500 |
| C                     | 0.93290600  | -4.06302200 | 0.09513900  |
| F                     | 0.24942800  | -3.31191900 | 0.97033000  |
| F                     | 2.19004300  | -4.18701800 | 0.50852600  |
| F                     | 0.35881500  | -5.26610300 | 0.02163700  |
| INT3                  |             |             |             |
| Energy = -4463.375329 |             |             |             |
| S                     | -0.63046800 | -0.54085000 | -3.40783800 |
| O                     | 0.00402800  | -1.55642100 | -4.24508100 |
| O                     | -0.68372700 | 0.86375200  | -3.78896800 |
| C                     | -2.20370600 | -1.09367700 | -2.83510800 |
| C                     | -3.23834600 | -0.16383500 | -2.70040500 |
| C                     | -2.38582500 | -2.45508200 | -2.55998200 |
| C                     | -4.48055800 | -0.61971500 | -2.27214100 |
| H                     | -3.06520900 | 0.88414600  | -2.91453900 |
| C                     | -3.63085700 | -2.87753300 | -2.11782300 |
| H                     | -1.57520100 | -3.16129100 | -2.70355300 |
| C                     | -4.69555700 | -1.97179700 | -1.96994500 |
| H                     | -5.28917400 | 0.09148800  | -2.14742100 |
| H                     | -3.78831800 | -3.92682700 | -1.88916300 |
| C                     | -6.02914900 | -2.43946900 | -1.45759400 |
| H                     | -6.03321000 | -2.38322600 | -0.36360700 |
| H                     | -6.84206600 | -1.81047900 | -1.82906200 |
| H                     | -6.22735300 | -3.47536300 | -1.74533300 |
| N                     | 0.30283500  | -0.57275900 | -1.87018500 |



|    |             |             |             |
|----|-------------|-------------|-------------|
| Fe | -0.79033500 | 0.03647300  | -0.18286500 |
| O  | 0.70932600  | -2.57261000 | 0.15117100  |
| S  | 1.10639300  | -1.76473400 | 1.31954400  |
| O  | 2.48055100  | -1.73589200 | 1.78430100  |
| O  | 0.53284300  | -0.30983100 | 1.14196200  |
| C  | 0.07399800  | -2.38933900 | 2.74780600  |
| F  | -1.15227400 | -2.68814900 | 2.32508200  |
| F  | 0.01207100  | -1.45169700 | 3.69121600  |
| F  | 0.65726200  | -3.48193900 | 3.23335600  |
| C  | 1.65967800  | 0.10056600  | -2.07435300 |
| H  | 1.61032400  | 1.11239500  | -1.67672000 |
| H  | 1.79768800  | 0.18956900  | -3.15876500 |
| C  | 2.75235800  | -0.73174200 | -1.49590900 |
| H  | 0.47270800  | -1.56598500 | -1.65686100 |
| H  | 2.71645400  | -1.78893700 | -1.74976200 |
| C  | 3.81271200  | -0.28506900 | -0.79072100 |
| C  | 4.91111100  | -1.21841300 | -0.44006800 |
| C  | 5.56404800  | -1.09336400 | 0.79722200  |
| C  | 5.31378900  | -2.24024400 | -1.31458600 |
| C  | 6.56981100  | -1.98431900 | 1.16004800  |
| H  | 5.25899100  | -0.30690600 | 1.47829200  |
| C  | 6.32637300  | -3.12640500 | -0.95357200 |
| H  | 4.84921200  | -2.32019700 | -2.29235900 |
| C  | 6.95482000  | -3.00395800 | 0.28674800  |
| H  | 7.05367900  | -1.88424400 | 2.12686700  |
| H  | 6.63261100  | -3.90508900 | -1.64565100 |
| H  | 7.74539900  | -3.69327500 | 0.56752300  |
| C  | 3.98317900  | 1.13210700  | -0.36513800 |
| C  | 3.05526600  | 1.77824500  | 0.46156600  |
| C  | 5.12437800  | 1.83427700  | -0.78620500 |
| C  | 3.25133400  | 3.10769000  | 0.83637600  |
| H  | 2.19459200  | 1.23248400  | 0.82525800  |
| C  | 5.31326200  | 3.16323600  | -0.41779800 |
| H  | 5.85724500  | 1.33011000  | -1.40853400 |
| C  | 4.37456800  | 3.80434500  | 0.39445800  |
| H  | 2.52057600  | 3.59880200  | 1.46912800  |
| H  | 6.19317100  | 3.69848400  | -0.76169100 |
| H  | 4.52176500  | 4.84052900  | 0.68342000  |
| O  | -2.32040300 | -0.87400700 | 0.40821900  |
| S  | -3.65578400 | -0.34843900 | 1.06083500  |
| O  | -4.53283400 | -1.48107500 | 1.32436000  |
| O  | -4.14799600 | 0.85011700  | 0.39525200  |
| C  | -3.00671000 | 0.23709600  | 2.71131700  |
| F  | -1.88871600 | 0.96158000  | 2.51039900  |

|                       |             |             |             |
|-----------------------|-------------|-------------|-------------|
| F                     | -3.92544400 | 1.00557700  | 3.28549300  |
| F                     | -2.71944000 | -0.79056100 | 3.50290100  |
| O                     | -1.32398500 | 1.74406600  | -0.62262200 |
| S                     | -0.70263900 | 3.17923200  | -0.84537200 |
| O                     | -1.67448500 | 4.03337500  | -1.50128100 |
| O                     | 0.67228800  | 3.07164000  | -1.31781700 |
| C                     | -0.60170700 | 3.69096000  | 0.94394600  |
| F                     | 0.08349100  | 2.75683000  | 1.62682400  |
| F                     | -1.81918000 | 3.80358600  | 1.46259900  |
| F                     | 0.04228800  | 4.85246300  | 1.03311000  |
| INT4                  |             |             |             |
| Energy = -1454.430686 |             |             |             |
| S                     | -3.07887300 | -0.39909000 | 0.15105800  |
| O                     | -3.10576700 | 0.79410300  | -0.70529800 |
| O                     | -4.27713000 | -1.22592400 | 0.32986500  |
| C                     | -1.72589000 | -1.41741300 | -0.40918400 |
| C                     | -1.54043000 | -2.68366500 | 0.14282200  |
| C                     | -0.88476900 | -0.93140000 | -1.40756100 |
| C                     | -0.47927700 | -3.46513100 | -0.30766200 |
| H                     | -2.21892500 | -3.04688800 | 0.90636100  |
| C                     | 0.17174100  | -1.72509000 | -1.84224700 |
| H                     | -1.05912900 | 0.05598700  | -1.81664900 |
| C                     | 0.39545200  | -2.99612400 | -1.29755100 |
| H                     | -0.32481200 | -4.45315900 | 0.11611700  |
| H                     | 0.83912800  | -1.35097800 | -2.61340400 |
| C                     | 1.58012700  | -3.81409900 | -1.73964100 |
| H                     | 2.50203200  | -3.40305900 | -1.31185000 |
| H                     | 1.49398700  | -4.85473200 | -1.41697200 |
| H                     | 1.69095100  | -3.80066400 | -2.82814800 |
| C                     | -1.66458100 | 1.13268800  | 1.87794700  |
| H                     | -1.86697300 | 1.56809500  | 2.86360900  |
| H                     | -1.85257000 | 1.90489000  | 1.12704400  |
| C                     | -0.25971900 | 0.60806000  | 1.81451500  |
| H                     | -0.07827100 | -0.23509700 | 2.47551000  |
| C                     | 0.73180200  | 0.99538400  | 0.98747200  |
| C                     | 0.60664600  | 2.15740700  | 0.07055500  |
| C                     | 0.97403100  | 2.03230100  | -1.27976300 |
| C                     | 0.12477600  | 3.39550400  | 0.51874500  |
| C                     | 0.82198000  | 3.09869100  | -2.16095500 |
| H                     | 1.37526300  | 1.08758600  | -1.62990900 |
| C                     | -0.02202800 | 4.46662000  | -0.36209600 |
| H                     | -0.11404200 | 3.52116600  | 1.56984100  |
| C                     | 0.31837000  | 4.31928600  | -1.70587300 |
| H                     | 1.09750500  | 2.97926200  | -3.20438100 |

|                       |             |             |             |
|-----------------------|-------------|-------------|-------------|
| H                     | -0.39655300 | 5.41751700  | 0.00421600  |
| H                     | 0.20177900  | 5.15157400  | -2.39289300 |
| C                     | 2.00443800  | 0.22686800  | 0.94390000  |
| C                     | 2.01054600  | -1.16643800 | 1.11704000  |
| C                     | 3.22895100  | 0.87589300  | 0.71894000  |
| C                     | 3.20399600  | -1.88385000 | 1.08746000  |
| H                     | 1.07023600  | -1.68988300 | 1.24132300  |
| C                     | 4.42273900  | 0.15796700  | 0.68746200  |
| H                     | 3.23999000  | 1.95090800  | 0.57361100  |
| C                     | 4.41622800  | -1.22509400 | 0.87302900  |
| H                     | 3.18529900  | -2.96135200 | 1.22256100  |
| H                     | 5.35980400  | 0.68018700  | 0.51949600  |
| H                     | 5.34591200  | -1.78513900 | 0.84452200  |
| N                     | -2.61378900 | 0.00461600  | 1.73135800  |
| H                     | -3.47972800 | 0.12127900  | 2.25289800  |
| 1-INT5                |             |             |             |
| Energy = -5377.081104 |             |             |             |
| S                     | 2.05412500  | -0.71078100 | -3.47170900 |
| O                     | 1.49425600  | 0.37583100  | -4.25766200 |
| O                     | 2.08220500  | -2.10185300 | -3.91056900 |
| C                     | 3.57900400  | -0.24933400 | -2.73358200 |
| C                     | 4.38189600  | -1.24998900 | -2.17542600 |
| C                     | 3.92269800  | 1.10181200  | -2.67589300 |
| C                     | 5.54190400  | -0.86884100 | -1.51715700 |
| H                     | 4.09442300  | -2.29077300 | -2.25636500 |
| C                     | 5.09357200  | 1.45366100  | -2.01447300 |
| H                     | 3.28302300  | 1.85364200  | -3.12266900 |
| C                     | 5.90031400  | 0.48542500  | -1.40248900 |
| H                     | 6.17726100  | -1.62755000 | -1.07037000 |
| H                     | 5.36369000  | 2.50075500  | -1.94525300 |
| C                     | 7.09571700  | 0.88396200  | -0.58265500 |
| H                     | 6.82240900  | 0.88104600  | 0.48010400  |
| H                     | 7.92413900  | 0.18142300  | -0.71005500 |
| H                     | 7.44590300  | 1.88645900  | -0.83853900 |
| C                     | 0.98054900  | 0.39385300  | -1.08138000 |
| H                     | -0.02009100 | 0.47334400  | -0.65728100 |
| H                     | 1.12501000  | 1.27215000  | -1.70963800 |
| C                     | 1.98589200  | 0.21936800  | 0.00440500  |
| H                     | 2.04341400  | -0.78002100 | 0.42584400  |
| C                     | 2.67536300  | 1.20493900  | 0.61127600  |
| C                     | 2.58681000  | 2.63087700  | 0.21520200  |
| C                     | 3.74888800  | 3.42345800  | 0.19790800  |
| C                     | 1.36979600  | 3.22143200  | -0.15848000 |
| C                     | 3.70458800  | 4.74259400  | -0.24369400 |

|    |             |             |             |
|----|-------------|-------------|-------------|
| H  | 4.68725000  | 2.99304000  | 0.53189500  |
| C  | 1.32500600  | 4.54356600  | -0.60019200 |
| H  | 0.44837900  | 2.66999200  | -0.04707700 |
| C  | 2.49243200  | 5.30351100  | -0.65825600 |
| H  | 4.61303100  | 5.33780800  | -0.25882000 |
| H  | 0.36973200  | 4.97331700  | -0.88260700 |
| H  | 2.45824100  | 6.33262800  | -1.00245400 |
| C  | 3.54405700  | 0.86321400  | 1.76646400  |
| C  | 4.37136600  | -0.26918000 | 1.75079200  |
| C  | 3.50390100  | 1.65321600  | 2.92536200  |
| C  | 5.14265200  | -0.60238700 | 2.86393300  |
| H  | 4.41404400  | -0.87680200 | 0.85459500  |
| C  | 4.26319400  | 1.31100800  | 4.04213800  |
| H  | 2.85080200  | 2.51871900  | 2.95084100  |
| C  | 5.08889000  | 0.18516400  | 4.01536900  |
| H  | 5.79490200  | -1.47073500 | 2.82988800  |
| H  | 4.20708500  | 1.92264900  | 4.93730900  |
| H  | 5.68750400  | -0.07427700 | 4.88305700  |
| C  | -0.52348400 | -1.12951500 | -2.47203100 |
| H  | -0.42570800 | -1.86366500 | -3.27588500 |
| H  | -0.91012600 | -0.18270400 | -2.84746100 |
| N  | -1.27222300 | -1.60436600 | -1.37183500 |
| S  | -1.24929400 | -3.21457700 | -1.00272000 |
| O  | -2.18958400 | -3.19538400 | 0.15681800  |
| O  | -1.46252200 | -4.07974200 | -2.16086100 |
| C  | 0.39261000  | -3.54150600 | -0.37410800 |
| C  | 1.36073800  | -4.04234300 | -1.25162600 |
| C  | 0.71323100  | -3.18747300 | 0.93900500  |
| C  | 2.67348600  | -4.16892500 | -0.80045800 |
| H  | 1.08596700  | -4.32316700 | -2.26197300 |
| C  | 2.03240900  | -3.32198800 | 1.36647100  |
| H  | -0.05016400 | -2.79702200 | 1.59920800  |
| C  | 3.02898000  | -3.80812900 | 0.50818800  |
| H  | 3.42863800  | -4.56767000 | -1.47232700 |
| H  | 2.29100900  | -3.02123500 | 2.37571500  |
| C  | 4.44739000  | -3.96476400 | 0.99089600  |
| H  | 5.16754400  | -3.72768500 | 0.20158600  |
| H  | 4.64483400  | -3.31778600 | 1.84797900  |
| H  | 4.63816400  | -4.99826800 | 1.30261800  |
| Fe | -2.45183900 | -0.83299300 | 0.08517800  |
| H  | 1.25332200  | -1.64163400 | -1.48116900 |
| N  | 0.92836500  | -0.81031000 | -1.99302500 |
| O  | -2.39788100 | 1.03679900  | -0.34508400 |
| S  | -2.57550500 | 1.97256000  | -1.57197400 |

|                                                     |             |             |             |
|-----------------------------------------------------|-------------|-------------|-------------|
| O                                                   | -1.32202100 | 2.01982100  | -2.33932600 |
| O                                                   | -3.83792900 | 1.78013400  | -2.26892600 |
| C                                                   | -2.68623600 | 3.58781200  | -0.64957800 |
| O                                                   | -4.34114900 | -1.19787100 | -1.03732100 |
| S                                                   | -5.14275500 | -1.30569000 | 0.24186300  |
| O                                                   | -6.08276100 | -2.40102300 | 0.38472700  |
| O                                                   | -4.08371600 | -1.13657000 | 1.33782300  |
| C                                                   | -6.12777600 | 0.27751700  | 0.34313000  |
| O                                                   | -1.09090500 | -0.65926400 | 1.48025400  |
| S                                                   | -0.91827800 | 0.44723100  | 2.56324000  |
| O                                                   | -0.10836700 | 1.55785700  | 2.06329100  |
| O                                                   | -2.14833400 | 0.71340800  | 3.29607200  |
| C                                                   | 0.18875600  | -0.52403700 | 3.70083500  |
| F                                                   | -2.54633300 | 4.58837800  | -1.52568800 |
| F                                                   | -3.86565600 | 3.68333400  | -0.04458700 |
| F                                                   | -1.71190300 | 3.66909900  | 0.26043100  |
| F                                                   | -6.90870400 | 0.22690200  | 1.42110400  |
| F                                                   | -6.87462900 | 0.38974600  | -0.75172400 |
| F                                                   | -5.30684400 | 1.32243200  | 0.43968900  |
| F                                                   | -0.39712500 | -1.67541500 | 4.04513300  |
| F                                                   | 0.44639800  | 0.19043700  | 4.79482600  |
| F                                                   | 1.34997700  | -0.81050200 | 3.08595200  |
| 1-TS4                                               |             |             |             |
| Energy = -5377.033033, Lowest Freq $\nu$ = -1665.02 |             |             |             |
| S                                                   | -1.90733000 | 0.78351600  | -2.95229700 |
| O                                                   | -2.45655000 | -0.17770200 | -3.90400400 |
| O                                                   | -1.20437600 | 1.98641200  | -3.39948300 |
| C                                                   | -3.11648400 | 1.17724100  | -1.72455000 |
| C                                                   | -2.78346600 | 2.06689100  | -0.70203200 |
| C                                                   | -4.37030300 | 0.57373100  | -1.79859700 |
| C                                                   | -3.72907800 | 2.33598200  | 0.27900800  |
| H                                                   | -1.80788500 | 2.53181000  | -0.66375400 |
| C                                                   | -5.30394000 | 0.86803500  | -0.80971600 |
| H                                                   | -4.59157000 | -0.12575800 | -2.59530600 |
| C                                                   | -4.99580900 | 1.73284400  | 0.24896600  |
| H                                                   | -3.46779900 | 3.00251400  | 1.09414600  |
| H                                                   | -6.28390100 | 0.40249500  | -0.84819800 |
| C                                                   | -5.97693400 | 1.95613300  | 1.36660600  |
| H                                                   | -5.81970400 | 1.19881100  | 2.14411500  |
| H                                                   | -5.84559400 | 2.93861300  | 1.82792200  |
| H                                                   | -7.00988400 | 1.86920900  | 1.01979900  |
| C                                                   | -1.10494200 | -1.45468400 | -1.55793400 |
| H                                                   | -0.18165800 | -2.02981100 | -1.47944300 |
| H                                                   | -1.69353400 | -1.87874400 | -2.37267000 |

|   |             |             |             |
|---|-------------|-------------|-------------|
| C | -1.83340200 | -1.41555900 | -0.25282900 |
| H | -1.31960800 | -0.86876900 | 0.53003400  |
| C | -3.00275900 | -2.02373300 | 0.03260500  |
| C | -3.67168000 | -2.91361300 | -0.95258200 |
| C | -5.02719500 | -2.74296800 | -1.27856500 |
| C | -2.95587200 | -3.94491400 | -1.57947300 |
| C | -5.63527400 | -3.55012900 | -2.23668200 |
| H | -5.59750900 | -1.97317300 | -0.77080700 |
| C | -3.56583000 | -4.75676900 | -2.53594800 |
| H | -1.92465500 | -4.12173800 | -1.29022400 |
| C | -4.90400900 | -4.55589300 | -2.87381200 |
| H | -6.68145300 | -3.39824700 | -2.48540900 |
| H | -2.99628900 | -5.54992700 | -3.01038300 |
| H | -5.37889800 | -5.18568600 | -3.61968800 |
| C | -3.64725800 | -1.83297800 | 1.35799900  |
| C | -3.38278500 | -0.69127800 | 2.13348100  |
| C | -4.52567300 | -2.79682400 | 1.87897000  |
| C | -3.96121600 | -0.52539700 | 3.38759500  |
| H | -2.72517200 | 0.07437400  | 1.74878200  |
| C | -5.11596300 | -2.62578100 | 3.13094900  |
| H | -4.73712100 | -3.69140800 | 1.30391400  |
| C | -4.83677000 | -1.49092700 | 3.89213400  |
| H | -3.71952600 | 0.35721000  | 3.97179000  |
| H | -5.78779900 | -3.38748300 | 3.51506400  |
| H | -5.29139900 | -1.36110000 | 4.86953000  |
| C | 0.74049800  | 0.13363800  | -2.45317900 |
| H | 0.78795300  | 0.68150700  | -3.39416500 |
| H | 1.26224000  | -0.82113200 | -2.50148600 |
| N | 1.17031800  | 0.95005700  | -1.29518700 |
| S | 1.77080600  | 2.52765500  | -1.57259900 |
| O | 2.82190800  | 2.54464200  | -0.50385500 |
| O | 2.10823300  | 2.72636500  | -2.97680500 |
| C | 0.52605100  | 3.67837900  | -1.05795700 |
| C | -0.22480200 | 4.35378000  | -2.02150800 |
| C | 0.31364500  | 3.86331800  | 0.31044500  |
| C | -1.23660400 | 5.20609900  | -1.59224300 |
| H | -0.02805900 | 4.19486100  | -3.07329000 |
| C | -0.70958900 | 4.71580600  | 0.71315300  |
| H | 0.93291000  | 3.35254500  | 1.03617400  |
| C | -1.50592200 | 5.38568700  | -0.22683000 |
| H | -1.83580500 | 5.73160900  | -2.32935700 |
| H | -0.89061500 | 4.85486600  | 1.77398500  |
| C | -2.65644500 | 6.25074700  | 0.21618900  |
| H | -3.59397300 | 5.68215300  | 0.17671500  |

|                       |             |             |             |
|-----------------------|-------------|-------------|-------------|
| H                     | -2.52356200 | 6.60175300  | 1.24254900  |
| H                     | -2.77690100 | 7.12098100  | -0.43466600 |
| Fe                    | 2.58118000  | 0.40335600  | 0.24745400  |
| H                     | -0.11378000 | 0.70246900  | -1.05167900 |
| N                     | -0.67944200 | -0.06246100 | -1.95382400 |
| O                     | 2.10213600  | -1.43038100 | 0.40625300  |
| S                     | 2.42515600  | -2.77413600 | -0.31748500 |
| O                     | 1.82851100  | -2.78256400 | -1.66064600 |
| O                     | 3.80192100  | -3.20283500 | -0.13496100 |
| C                     | 1.36080600  | -3.88157400 | 0.73604400  |
| O                     | 4.13463200  | -0.10226000 | -1.30732600 |
| S                     | 5.23956000  | 0.38728200  | -0.39255400 |
| O                     | 6.14754400  | 1.40004800  | -0.89567800 |
| O                     | 4.48780500  | 0.70723500  | 0.91447100  |
| C                     | 6.28704100  | -1.10930700 | 0.06310800  |
| O                     | 1.52614400  | 1.07879600  | 1.71688400  |
| S                     | 0.73651700  | 0.37649400  | 2.86493500  |
| O                     | -0.07178800 | -0.73600400 | 2.37181600  |
| O                     | 1.54091200  | 0.23633600  | 4.06819700  |
| C                     | -0.48275400 | 1.74640400  | 3.18468900  |
| F                     | 1.55618700  | -5.14401600 | 0.35143200  |
| F                     | 1.68877000  | -3.74332700 | 2.01436900  |
| F                     | 0.07116700  | -3.56720400 | 0.56516800  |
| F                     | 7.50383800  | -0.67195400 | 0.38342400  |
| F                     | 6.35896800  | -1.91487500 | -0.98885700 |
| F                     | 5.75617000  | -1.73760900 | 1.10223600  |
| F                     | 0.13821100  | 2.90244900  | 3.44140000  |
| F                     | -1.26108000 | 1.42373600  | 4.21781400  |
| F                     | -1.26440500 | 1.91977500  | 2.09872100  |
| 1-INT6                |             |             |             |
| Energy = -5377.074616 |             |             |             |
| S                     | -1.69677800 | 0.92164100  | -3.14250500 |
| O                     | -2.39555400 | 0.18761600  | -4.19710700 |
| O                     | -0.91828400 | 2.13458900  | -3.43544400 |
| C                     | -2.88747300 | 1.29768800  | -1.87298600 |
| C                     | -2.58343200 | 2.26322900  | -0.91549900 |
| C                     | -4.09158000 | 0.59387700  | -1.83520300 |
| C                     | -3.49768700 | 2.51886200  | 0.10193000  |
| H                     | -1.65308700 | 2.81001800  | -0.96395500 |
| C                     | -4.99329400 | 0.86541700  | -0.81205900 |
| H                     | -4.30484400 | -0.15621000 | -2.58716700 |
| C                     | -4.70929100 | 1.82006500  | 0.17534400  |
| H                     | -3.25183900 | 3.25572200  | 0.86068500  |
| H                     | -5.92989100 | 0.31756900  | -0.76862100 |

|   |             |             |             |
|---|-------------|-------------|-------------|
| C | -5.66205200 | 2.03680100  | 1.32017000  |
| H | -5.53669600 | 1.23769600  | 2.06040300  |
| H | -5.47959300 | 2.99088700  | 1.82181400  |
| H | -6.70340100 | 2.01579600  | 0.98557800  |
| C | -1.04313000 | -1.47312000 | -2.01598300 |
| H | -0.16055500 | -2.11686400 | -2.06443800 |
| H | -1.74062600 | -1.82590400 | -2.77817900 |
| C | -1.64946000 | -1.49798400 | -0.64229100 |
| H | -1.12304200 | -0.90944800 | 0.09850900  |
| C | -2.77309900 | -2.14280000 | -0.27181400 |
| C | -3.50329600 | -3.03634600 | -1.20615800 |
| C | -4.88953200 | -2.89795000 | -1.38744800 |
| C | -2.82551300 | -4.02720600 | -1.93237300 |
| C | -5.57083600 | -3.70104800 | -2.29836800 |
| H | -5.42375900 | -2.15317900 | -0.80668600 |
| C | -3.50953800 | -4.83614400 | -2.84019000 |
| H | -1.76305400 | -4.17252400 | -1.76198200 |
| C | -4.88131700 | -4.67069100 | -3.03110700 |
| H | -6.64046900 | -3.57356100 | -2.43672600 |
| H | -2.97036100 | -5.59939400 | -3.39307900 |
| H | -5.41309500 | -5.29873900 | -3.73934900 |
| C | -3.32448500 | -1.96898500 | 1.09591900  |
| C | -3.17161900 | -0.75444700 | 1.78265700  |
| C | -3.99963800 | -3.01859200 | 1.73961000  |
| C | -3.64915700 | -0.60327900 | 3.08160400  |
| H | -2.67960000 | 0.07466700  | 1.29318500  |
| C | -4.48977500 | -2.86312000 | 3.03531000  |
| H | -4.12866400 | -3.96350700 | 1.22223000  |
| C | -4.31343500 | -1.65625800 | 3.71426900  |
| H | -3.49190900 | 0.33820700  | 3.60035200  |
| H | -5.00266400 | -3.68950200 | 3.51850500  |
| H | -4.68942400 | -1.53806900 | 4.72614400  |
| C | 0.78090900  | 0.25975700  | -2.34506000 |
| H | 1.07979300  | 0.87310200  | -3.19401400 |
| H | 1.39602900  | -0.63766700 | -2.31241200 |
| N | 1.10558000  | 1.05356300  | -1.09257700 |
| S | 1.96452800  | 2.56760100  | -1.28772800 |
| O | 2.89496100  | 2.42055500  | -0.12390500 |
| O | 2.46775100  | 2.66132600  | -2.64779900 |
| C | 0.81476800  | 3.85045400  | -0.92753300 |
| C | 0.14609800  | 4.47501300  | -1.98422300 |
| C | 0.52590400  | 4.12960600  | 0.40939000  |
| C | -0.85481800 | 5.38805600  | -1.67409600 |
| H | 0.38215300  | 4.22251600  | -3.00922100 |



|                       |             |             |             |
|-----------------------|-------------|-------------|-------------|
| C                     | -0.48834900 | 5.03688300  | 0.69025000  |
| H                     | 1.08190200  | 3.64872000  | 1.20059800  |
| C                     | -1.20200300 | 5.66442100  | -0.34204100 |
| H                     | -1.39428000 | 5.87518500  | -2.48005700 |
| H                     | -0.73229800 | 5.25049600  | 1.72604200  |
| C                     | -2.35261400 | 6.58390000  | -0.03105200 |
| H                     | -3.29922800 | 6.03305100  | -0.09282300 |
| H                     | -2.27477000 | 6.99961100  | 0.97651300  |
| H                     | -2.41005400 | 7.41000300  | -0.74494500 |
| Fe                    | 2.50925300  | 0.22171100  | 0.41071500  |
| H                     | 0.25943000  | 1.20913200  | -0.52054800 |
| N                     | -0.59251200 | -0.11561200 | -2.39700200 |
| O                     | 1.48104000  | -1.36875000 | 0.28505300  |
| S                     | 1.84610000  | -2.89847300 | 0.29127500  |
| O                     | 1.21713600  | -3.54836500 | -0.85555000 |
| O                     | 3.26382000  | -3.08985700 | 0.57593200  |
| C                     | 0.92830200  | -3.44056100 | 1.82053700  |
| O                     | 3.74656600  | -0.11417000 | -1.45961500 |
| S                     | 5.00407300  | -0.08878300 | -0.62079400 |
| O                     | 6.03050400  | 0.89065300  | -0.91663600 |
| O                     | 4.43207000  | -0.04439900 | 0.82252900  |
| C                     | 5.80076700  | -1.80218000 | -0.78623400 |
| O                     | 1.69685700  | 0.88956600  | 2.05130700  |
| S                     | 0.17979100  | 0.77248400  | 2.36482400  |
| O                     | -0.59612600 | 1.33087800  | 1.23774500  |
| O                     | -0.20646300 | -0.50663300 | 2.93304100  |
| C                     | 0.02794500  | 2.01812700  | 3.74032500  |
| F                     | 1.09121000  | -4.76033100 | 1.94160500  |
| F                     | 1.45147800  | -2.82957900 | 2.88078400  |
| F                     | -0.36391500 | -3.15852700 | 1.71539300  |
| F                     | 6.96672600  | -1.63435000 | -1.40424000 |
| F                     | 5.01833800  | -2.58023700 | -1.51692900 |
| F                     | 5.99753100  | -2.31256000 | 0.41800100  |
| F                     | 0.68603100  | 1.59342300  | 4.81090800  |
| F                     | -1.26963900 | 2.15522600  | 4.02776100  |
| F                     | 0.51541300  | 3.20891200  | 3.36459900  |
| 1-INT7                |             |             |             |
| Energy = -1492.930039 |             |             |             |
| S                     | 3.08024300  | 0.10435800  | -0.27081700 |
| O                     | 3.01966600  | -1.15272200 | -0.99339500 |
| O                     | 4.30173300  | 0.84079000  | 0.01516200  |
| C                     | 1.77205800  | 1.17729100  | -0.71497100 |
| C                     | 1.80962400  | 2.50861200  | -0.28470100 |
| C                     | 0.74220900  | 0.67790100  | -1.52032000 |

|   |             |             |             |
|---|-------------|-------------|-------------|
| C | 0.77279700  | 3.35046100  | -0.66688100 |
| H | 2.63766500  | 2.87683000  | 0.30990900  |
| C | -0.27269200 | 1.54645900  | -1.89214400 |
| H | 0.74211800  | -0.35611700 | -1.84187800 |
| C | -0.28357000 | 2.88523000  | -1.46708800 |
| H | 0.78536600  | 4.38748100  | -0.34835700 |
| H | -1.07661000 | 1.18324200  | -2.52349900 |
| C | -1.42807700 | 3.78406300  | -1.83725100 |
| H | -1.71394600 | 3.65167800  | -2.88424800 |
| H | -2.30233200 | 3.53292500  | -1.22496200 |
| H | -1.18839000 | 4.83614400  | -1.67179000 |
| C | 1.46740800  | -1.42951200 | 1.63702900  |
| H | 1.67436900  | -2.01825300 | 2.53832100  |
| H | 1.50767400  | -2.09570500 | 0.77448800  |
| C | 0.18731600  | -0.65566300 | 1.70787500  |
| H | 0.18153500  | 0.15753300  | 2.42815400  |
| C | -0.91927600 | -0.87775500 | 0.96111300  |
| C | -1.04057300 | -2.03478200 | 0.04072800  |
| C | -1.55454700 | -1.85656700 | -1.25586200 |
| C | -0.65457600 | -3.32528900 | 0.43718800  |
| C | -1.62700800 | -2.92560700 | -2.14410700 |
| H | -1.90197200 | -0.87478900 | -1.55672500 |
| C | -0.73838300 | -4.39815100 | -0.44897900 |
| H | -0.33058900 | -3.49640200 | 1.45903600  |
| C | -1.21275600 | -4.19848600 | -1.74520300 |
| H | -2.01608600 | -2.76989000 | -3.14505700 |
| H | -0.44630600 | -5.39078400 | -0.12255600 |
| H | -1.27696100 | -5.03276400 | -2.43570600 |
| C | -2.06120300 | 0.06418400  | 1.04625600  |
| C | -1.84773500 | 1.43804200  | 1.24875500  |
| C | -3.38085500 | -0.40112100 | 0.92465700  |
| C | -2.92195200 | 2.31846200  | 1.34122500  |
| H | -0.83397600 | 1.81917900  | 1.30000800  |
| C | -4.45511600 | 0.48039700  | 1.01933300  |
| H | -3.56167200 | -1.45893500 | 0.76944100  |
| C | -4.23030000 | 1.84167600  | 1.22806300  |
| H | -2.74006200 | 3.37715200  | 1.49828500  |
| H | -5.46882600 | 0.10324400  | 0.93408800  |
| H | -5.06803200 | 2.52761200  | 1.29939400  |
| C | 3.35874800  | -0.10677000 | 2.45575300  |
| H | 4.17565200  | 0.58150100  | 2.25093700  |
| H | 3.18155700  | -0.48005700 | 3.46269100  |
| N | 2.61364400  | -0.48764800 | 1.49516400  |

TsNH[Fe]

Energy = -3884.133749

|    |             |             |             |
|----|-------------|-------------|-------------|
| N  | 0.37283700  | -0.85479100 | -1.47005900 |
| S  | 1.10529100  | -2.24712100 | -1.08257600 |
| O  | 0.61073600  | -2.38041300 | 0.33992700  |
| O  | 0.92245100  | -3.35263000 | -2.02825800 |
| C  | 2.85116000  | -1.91206500 | -0.95549400 |
| C  | 3.71504000  | -2.35661600 | -1.95293400 |
| C  | 3.31208700  | -1.15610800 | 0.12338300  |
| C  | 5.06780300  | -2.02957100 | -1.86464800 |
| H  | 3.32914500  | -2.95506500 | -2.77054000 |
| C  | 4.66103700  | -0.83411300 | 0.19009200  |
| H  | 2.62422700  | -0.82861900 | 0.88936200  |
| C  | 5.55664900  | -1.26086500 | -0.80141000 |
| H  | 5.75311800  | -2.37380900 | -2.63465100 |
| H  | 5.01457500  | -0.23005300 | 1.02038000  |
| C  | 7.01484500  | -0.88271500 | -0.72211200 |
| H  | 7.59924500  | -1.37158300 | -1.50650900 |
| H  | 7.14437300  | 0.20025400  | -0.83201300 |
| H  | 7.44555600  | -1.16111200 | 0.24600600  |
| Fe | -0.66467700 | -0.48059200 | 0.15305100  |
| H  | 0.08775700  | -0.69519800 | -2.43488300 |
| O  | -1.71767700 | 1.01284700  | -0.49970400 |
| S  | -2.09408800 | 1.50157400  | -1.91692700 |
| O  | -1.57250900 | 0.63154800  | -2.97826200 |
| O  | -3.48339800 | 1.94357800  | -1.97636400 |
| C  | -1.04304800 | 3.03125100  | -1.98258800 |
| O  | -2.35828200 | -1.95718300 | -0.46040700 |
| S  | -2.78715800 | -2.07163400 | 0.97146400  |
| O  | -3.03335400 | -3.39173400 | 1.53433100  |
| O  | -1.84151500 | -1.16000100 | 1.74818000  |
| C  | -4.41482700 | -1.17487100 | 1.06331700  |
| O  | 0.54105300  | 0.49095300  | 1.35598700  |
| S  | 1.27749600  | 1.84253900  | 1.24704500  |
| O  | 2.29215600  | 1.85088700  | 0.19250300  |
| O  | 0.38859200  | 2.99061000  | 1.40540500  |
| C  | 2.23622000  | 1.71404100  | 2.83489100  |
| F  | -1.20236400 | 3.61803500  | -3.18014700 |
| F  | -1.39794500 | 3.89012000  | -1.02974000 |
| F  | 0.24278900  | 2.70254700  | -1.83355400 |
| F  | -5.31629100 | -1.83623600 | 0.32773500  |
| F  | -4.29900900 | 0.06729200  | 0.60489200  |
| F  | -4.83217500 | -1.13991300 | 2.33501500  |
| F  | 1.42023000  | 1.58842600  | 3.88348600  |
| F  | 2.98024200  | 2.81766700  | 2.99483800  |

|                                                    |             |             |             |
|----------------------------------------------------|-------------|-------------|-------------|
| F                                                  | 3.06244000  | 0.65100400  | 2.80504800  |
| 1-TS5                                              |             |             |             |
| Energy = -2406.602137, Lowest Freq $\nu$ = -158.10 |             |             |             |
| S                                                  | -0.60816000 | -1.87707800 | 0.48572900  |
| O                                                  | 0.29849800  | -3.00831600 | 0.60465700  |
| O                                                  | -2.05809700 | -1.97969500 | 0.62743200  |
| C                                                  | -0.01015200 | -0.51310200 | 1.43609500  |
| C                                                  | -0.88269500 | 0.53129700  | 1.75029000  |
| C                                                  | 1.33042200  | -0.49934900 | 1.82422500  |
| C                                                  | -0.37638800 | 1.63552400  | 2.43152200  |
| H                                                  | -1.93133500 | 0.46538600  | 1.48432300  |
| C                                                  | 1.80764100  | 0.60890600  | 2.51177600  |
| H                                                  | 1.97930400  | -1.33309800 | 1.58693600  |
| C                                                  | 0.97380800  | 1.69829400  | 2.80956900  |
| H                                                  | -1.03987900 | 2.45603900  | 2.68716700  |
| H                                                  | 2.84911500  | 0.63871100  | 2.81462900  |
| C                                                  | 1.53561200  | 2.90565900  | 3.50850800  |
| H                                                  | 2.32806800  | 3.35786800  | 2.90202100  |
| H                                                  | 0.76964700  | 3.66123200  | 3.69411500  |
| H                                                  | 1.98272800  | 2.62985400  | 4.46878500  |
| C                                                  | 0.97072600  | -1.40444000 | -1.81490200 |
| H                                                  | 0.80385200  | -1.60889100 | -2.87812500 |
| H                                                  | 1.43751900  | -2.28667500 | -1.37833100 |
| C                                                  | 1.78996400  | -0.16912700 | -1.59721100 |
| H                                                  | 1.34776400  | 0.75281800  | -1.96301200 |
| C                                                  | 3.01410900  | -0.09573700 | -1.02712800 |
| C                                                  | 3.80789700  | -1.29165100 | -0.65248500 |
| C                                                  | 4.46789300  | -1.34001100 | 0.58802200  |
| C                                                  | 3.93455400  | -2.38645100 | -1.52214400 |
| C                                                  | 5.18411100  | -2.47109400 | 0.96819600  |
| H                                                  | 4.41975900  | -0.48062100 | 1.24819400  |
| C                                                  | 4.66184000  | -3.51440800 | -1.14578900 |
| H                                                  | 3.49546800  | -2.33548400 | -2.51334800 |
| C                                                  | 5.27804000  | -3.56448800 | 0.10425300  |
| H                                                  | 5.67777500  | -2.49742600 | 1.93419600  |
| H                                                  | 4.75682400  | -4.34805800 | -1.83374100 |
| H                                                  | 5.84299200  | -4.44293600 | 0.39785700  |
| C                                                  | 3.61049200  | 1.23405000  | -0.74134200 |
| C                                                  | 2.82448500  | 2.28452700  | -0.24118900 |
| C                                                  | 4.97927200  | 1.46358100  | -0.95306500 |
| C                                                  | 3.38180500  | 3.53504200  | 0.01611700  |
| H                                                  | 1.78199300  | 2.10257800  | -0.00621900 |
| C                                                  | 5.53614100  | 2.71500400  | -0.70087500 |
| H                                                  | 5.60108300  | 0.65819700  | -1.32868700 |

|                       |             |             |             |
|-----------------------|-------------|-------------|-------------|
| C                     | 4.74033100  | 3.75491900  | -0.21695000 |
| H                     | 2.75954300  | 4.33547200  | 0.40479900  |
| H                     | 6.59312000  | 2.87927800  | -0.88276500 |
| H                     | 5.17732900  | 4.72753700  | -0.01610000 |
| C                     | -1.47749400 | -0.94325600 | -1.86885300 |
| H                     | -2.43009000 | -1.24831000 | -1.45532500 |
| H                     | -1.40007200 | -0.82425100 | -2.94423000 |
| N                     | -1.92597100 | 0.98189600  | -1.55701300 |
| S                     | -3.62907000 | 1.45899500  | -1.87910600 |
| O                     | -3.70941700 | 2.88729000  | -1.58727100 |
| O                     | -3.87772400 | 0.88371900  | -3.19436200 |
| C                     | -4.41811700 | 0.51046800  | -0.61697400 |
| C                     | -4.91706100 | -0.75624600 | -0.93109000 |
| C                     | -4.46072000 | 1.01745400  | 0.68521200  |
| C                     | -5.43838900 | -1.53729600 | 0.09372500  |
| H                     | -4.90901200 | -1.10636300 | -1.95740000 |
| C                     | -4.98447900 | 0.21557900  | 1.69217000  |
| H                     | -4.11252800 | 2.02328500  | 0.89362100  |
| C                     | -5.46285500 | -1.07604800 | 1.41834000  |
| H                     | -5.83175900 | -2.52220200 | -0.13589400 |
| H                     | -5.03062300 | 0.59647700  | 2.70745300  |
| C                     | -5.97286100 | -1.95710200 | 2.52485300  |
| H                     | -5.17058500 | -2.61540300 | 2.87870000  |
| H                     | -6.32195500 | -1.37098600 | 3.37786800  |
| H                     | -6.79155900 | -2.59492400 | 2.18276600  |
| N                     | -0.39385900 | -1.32197900 | -1.21107900 |
| C                     | -1.13568300 | 1.85663600  | -1.08755500 |
| H                     | -0.10598700 | 1.57699500  | -0.88081000 |
| H                     | -1.47355700 | 2.87703500  | -0.89435900 |
| 1-INT8                |             |             |             |
| Energy = -2406.614623 |             |             |             |
| S                     | 1.30524000  | -1.64817500 | 1.99482100  |
| O                     | 0.85472800  | -2.45899900 | 3.11764100  |
| O                     | 2.67515200  | -1.15068200 | 1.84656800  |
| C                     | 0.83823600  | -2.44829400 | 0.47282900  |
| C                     | 1.53291700  | -2.13190800 | -0.69757200 |
| C                     | -0.30505600 | -3.24889500 | 0.44349500  |
| C                     | 1.04728700  | -2.60256500 | -1.91704400 |
| H                     | 2.43801300  | -1.53766500 | -0.64277200 |
| C                     | -0.77002500 | -3.70996500 | -0.78411800 |
| H                     | -0.81269300 | -3.51028500 | 1.36430700  |
| C                     | -0.11603300 | -3.38347800 | -1.98137200 |
| H                     | 1.58369200  | -2.36992300 | -2.83240600 |
| H                     | -1.66274000 | -4.32383800 | -0.81421500 |

|   |             |             |             |
|---|-------------|-------------|-------------|
| C | -0.65197500 | -3.88204100 | -3.29657500 |
| H | -1.71910900 | -3.65750700 | -3.38995900 |
| H | -0.12954300 | -3.43224700 | -4.14355500 |
| H | -0.54258300 | -4.96907000 | -3.37386400 |
| C | -1.08646700 | -0.36618300 | 2.51850800  |
| H | -1.04648300 | -0.36464800 | 3.61073100  |
| H | -1.46936900 | -1.33341400 | 2.19986600  |
| C | -1.93485700 | 0.75552400  | 1.99634600  |
| H | -1.76651200 | 1.72807000  | 2.45063000  |
| C | -2.83095000 | 0.69379800  | 0.98391100  |
| C | -3.27283300 | -0.58292100 | 0.35710100  |
| C | -3.31435500 | -0.70019800 | -1.04342300 |
| C | -3.69775600 | -1.67333400 | 1.13303400  |
| C | -3.73631600 | -1.88158400 | -1.64855500 |
| H | -3.04197700 | 0.15456000  | -1.65533400 |
| C | -4.12899800 | -2.85269200 | 0.52741600  |
| H | -3.73254600 | -1.57634900 | 2.21318800  |
| C | -4.14558600 | -2.96182100 | -0.86419700 |
| H | -3.76990500 | -1.95015100 | -2.73133800 |
| H | -4.47352900 | -3.67768000 | 1.14254900  |
| H | -4.49742200 | -3.87455600 | -1.33446500 |
| C | -3.39887400 | 1.94647300  | 0.42367200  |
| C | -2.59760800 | 3.09046100  | 0.26923800  |
| C | -4.74237900 | 2.00502000  | 0.01866800  |
| C | -3.12907000 | 4.26560600  | -0.25600800 |
| H | -1.54695100 | 3.05778400  | 0.54061400  |
| C | -5.27468800 | 3.18309300  | -0.49789700 |
| H | -5.37065700 | 1.12719100  | 0.12535800  |
| C | -4.47049200 | 4.31591800  | -0.63734300 |
| H | -2.49330900 | 5.13656200  | -0.37730300 |
| H | -6.31854800 | 3.21778600  | -0.79207800 |
| H | -4.88520300 | 5.23041300  | -1.04844400 |
| C | 0.84543000  | 0.93334800  | 1.46407900  |
| H | 1.92610300  | 0.96372600  | 1.59343100  |
| H | 0.39215700  | 1.82557200  | 1.89325100  |
| N | 0.62359900  | 1.06739200  | -0.04608600 |
| S | 1.57779100  | 2.41367300  | -0.89640900 |
| O | 1.09539000  | 2.33391600  | -2.26690800 |
| O | 1.35438400  | 3.54432900  | -0.01047000 |
| C | 3.19331900  | 1.75025500  | -0.72810000 |
| C | 3.96661400  | 2.11841700  | 0.37850900  |
| C | 3.62687500  | 0.79542100  | -1.65511700 |
| C | 5.19355600  | 1.49422000  | 0.56097900  |
| H | 3.61621700  | 2.88098600  | 1.06479100  |

|                                                   |             |             |             |
|---------------------------------------------------|-------------|-------------|-------------|
| C                                                 | 4.85862700  | 0.18892500  | -1.44731500 |
| H                                                 | 3.02051800  | 0.55313600  | -2.52050400 |
| C                                                 | 5.65146400  | 0.51311800  | -0.33317500 |
| H                                                 | 5.80749400  | 1.76946500  | 1.41206600  |
| H                                                 | 5.21695900  | -0.54654600 | -2.16020700 |
| C                                                 | 6.95648600  | -0.19070500 | -0.08912800 |
| H                                                 | 6.80460700  | -1.02954300 | 0.60058100  |
| H                                                 | 7.37636300  | -0.59278700 | -1.01361700 |
| H                                                 | 7.69084800  | 0.47761200  | 0.36692200  |
| N                                                 | 0.31538500  | -0.25334100 | 1.99750300  |
| C                                                 | -0.14028600 | 0.31696700  | -0.73840900 |
| H                                                 | -0.70691900 | -0.47586700 | -0.26700100 |
| H                                                 | -0.22281500 | 0.50451000  | -1.80501500 |
| 1-TS6                                             |             |             |             |
| Energy = -2406.60331, Lowest Freq $\nu$ = -140.59 |             |             |             |
| S                                                 | -0.24227500 | -2.59485700 | -1.81124800 |
| O                                                 | 0.84498200  | -3.03158200 | -2.67966200 |
| O                                                 | -1.63637200 | -2.99899000 | -1.97889900 |
| C                                                 | 0.21851900  | -2.90842900 | -0.11991000 |
| C                                                 | -0.78088300 | -2.95123200 | 0.85667100  |
| C                                                 | 1.56831600  | -3.02845500 | 0.21618500  |
| C                                                 | -0.41330500 | -3.10553700 | 2.18890700  |
| H                                                 | -1.82342300 | -2.88364700 | 0.56765000  |
| C                                                 | 1.91114500  | -3.19446400 | 1.55576100  |
| H                                                 | 2.33018200  | -3.00489000 | -0.55417000 |
| C                                                 | 0.93452500  | -3.23177500 | 2.55978100  |
| H                                                 | -1.18284200 | -3.14611000 | 2.95393900  |
| H                                                 | 2.95665000  | -3.29849800 | 1.82256200  |
| C                                                 | 1.31966100  | -3.44167900 | 4.00033600  |
| H                                                 | 2.32432000  | -3.06351000 | 4.20564400  |
| H                                                 | 0.61875500  | -2.94941200 | 4.67941800  |
| H                                                 | 1.31600100  | -4.51000200 | 4.24570800  |
| C                                                 | 0.96583400  | -0.16235800 | -2.33846900 |
| H                                                 | 0.87891900  | 0.16109200  | -3.38296800 |
| H                                                 | 1.77591700  | -0.88345200 | -2.29297900 |
| C                                                 | 1.24522800  | 1.07247500  | -1.49379400 |
| H                                                 | 0.61548900  | 1.92417100  | -1.73472700 |
| C                                                 | 2.36781700  | 1.33071700  | -0.73271700 |
| C                                                 | 3.34903000  | 0.26239200  | -0.42265400 |
| C                                                 | 3.64459100  | -0.03006500 | 0.91977700  |
| C                                                 | 4.00201100  | -0.45949000 | -1.43498000 |
| C                                                 | 4.55038400  | -1.03797700 | 1.23999800  |
| H                                                 | 3.16727300  | 0.54120300  | 1.70913000  |
| C                                                 | 4.91265100  | -1.46311200 | -1.11148300 |

|                       |             |             |             |
|-----------------------|-------------|-------------|-------------|
| H                     | 3.83028900  | -0.20611100 | -2.47561600 |
| C                     | 5.18282000  | -1.75980100 | 0.22627700  |
| H                     | 4.77011800  | -1.25236100 | 2.28079400  |
| H                     | 5.42012200  | -2.00345300 | -1.90338600 |
| H                     | 5.89589500  | -2.53868800 | 0.47565200  |
| C                     | 2.59487200  | 2.65992400  | -0.13534200 |
| C                     | 1.55396200  | 3.59753500  | 0.02803200  |
| C                     | 3.89581200  | 3.03070700  | 0.26001700  |
| C                     | 1.80543300  | 4.84829900  | 0.57496900  |
| H                     | 0.53746100  | 3.35621600  | -0.25575300 |
| C                     | 4.14569000  | 4.29103300  | 0.79485500  |
| H                     | 4.71547700  | 2.33600600  | 0.12404300  |
| C                     | 3.10248400  | 5.20137100  | 0.95983000  |
| H                     | 0.98706800  | 5.54782300  | 0.70691500  |
| H                     | 5.15662500  | 4.56150700  | 1.08041100  |
| H                     | 3.29554800  | 6.18072100  | 1.38503700  |
| C                     | -1.40716600 | -0.17668500 | -1.53092800 |
| H                     | -2.26651000 | -0.83752300 | -1.43012300 |
| H                     | -1.64753300 | 0.63919400  | -2.22101600 |
| N                     | -1.13398600 | 0.50409900  | -0.19903300 |
| S                     | -2.08459000 | 1.98982100  | 0.13978900  |
| O                     | -1.56920200 | 2.44230700  | 1.42676200  |
| O                     | -1.96395300 | 2.79243100  | -1.07611500 |
| C                     | -3.69778600 | 1.30369200  | 0.27890900  |
| C                     | -4.54901100 | 1.34340400  | -0.82916900 |
| C                     | -4.07708900 | 0.70885700  | 1.48677600  |
| C                     | -5.80675300 | 0.76169700  | -0.71627400 |
| H                     | -4.23491700 | 1.83019200  | -1.74514000 |
| C                     | -5.33908200 | 0.13580800  | 1.57129100  |
| H                     | -3.40316600 | 0.71011200  | 2.33588300  |
| C                     | -6.22093100 | 0.15127100  | 0.47744800  |
| H                     | -6.48118800 | 0.78583200  | -1.56604400 |
| H                     | -5.65229100 | -0.32709800 | 2.50160700  |
| C                     | -7.59640200 | -0.44595800 | 0.59540500  |
| H                     | -7.61179800 | -1.27921200 | 1.30194800  |
| H                     | -8.30565100 | 0.30660500  | 0.95980200  |
| H                     | -7.96268200 | -0.80103100 | -0.37057800 |
| N                     | -0.26691600 | -0.89020200 | -1.97018800 |
| C                     | 0.06841500  | 0.41127400  | 0.33809100  |
| H                     | 0.60198700  | -0.52665600 | 0.26409800  |
| H                     | 0.30567400  | 1.10031400  | 1.14188700  |
| 1-INT9                |             |             |             |
| Energy = -2406.616875 |             |             |             |
| S                     | -0.48643000 | -2.60002000 | -1.79194600 |



|   |             |             |             |
|---|-------------|-------------|-------------|
| O | 0.52242700  | -3.06754200 | -2.73998100 |
| O | -1.89599500 | -2.97499300 | -1.84971100 |
| C | 0.11903100  | -2.92204000 | -0.14773800 |
| C | -0.76520400 | -2.85061000 | 0.93151500  |
| C | 1.48641100  | -3.12263500 | 0.04810900  |
| C | -0.26007800 | -2.95937900 | 2.22205200  |
| H | -1.82474000 | -2.70922000 | 0.75492200  |
| C | 1.97149200  | -3.23159600 | 1.34917800  |
| H | 2.14918700  | -3.19967800 | -0.80522300 |
| C | 1.11240500  | -3.14452500 | 2.45253900  |
| H | -0.93901500 | -2.90373500 | 3.06766000  |
| H | 3.03293100  | -3.38950100 | 1.50942500  |
| C | 1.64038000  | -3.28146000 | 3.85639100  |
| H | 2.71220900  | -3.07336600 | 3.90391900  |
| H | 1.12564600  | -2.60485500 | 4.54424400  |
| H | 1.48650900  | -4.30093900 | 4.22814200  |
| C | 0.80453500  | -0.22731600 | -2.15960800 |
| H | 0.85039700  | 0.21069400  | -3.16253300 |
| H | 1.57639800  | -0.98832600 | -2.09640100 |
| C | 0.99417100  | 0.89183700  | -1.10282900 |
| H | 0.43761800  | 1.76963000  | -1.42731100 |
| C | 2.35054500  | 1.28744800  | -0.67135400 |
| C | 3.36575400  | 0.26122700  | -0.43391600 |
| C | 3.87801700  | 0.11892500  | 0.87570800  |
| C | 3.82384400  | -0.60983000 | -1.44471700 |
| C | 4.78126100  | -0.89622600 | 1.16986700  |
| H | 3.52507300  | 0.77877900  | 1.66011500  |
| C | 4.76424800  | -1.58969400 | -1.15037700 |
| H | 3.50257400  | -0.47329500 | -2.46993100 |
| C | 5.23022900  | -1.74771200 | 0.15855700  |
| H | 5.14305500  | -1.01505300 | 2.18548900  |
| H | 5.13581200  | -2.23015700 | -1.94276600 |
| H | 5.94986800  | -2.52741300 | 0.38537100  |
| C | 2.61320700  | 2.63417900  | -0.26986300 |
| C | 1.57060900  | 3.59493300  | -0.10543500 |
| C | 3.95878800  | 3.05039800  | -0.04214400 |
| C | 1.86792900  | 4.88143400  | 0.30422000  |
| H | 0.53026100  | 3.33230600  | -0.25823400 |
| C | 4.24194000  | 4.34753000  | 0.34715800  |
| H | 4.76735600  | 2.35280700  | -0.21871900 |
| C | 3.19833800  | 5.26247000  | 0.52946800  |
| H | 1.06482900  | 5.59483200  | 0.45038900  |
| H | 5.27013600  | 4.65646000  | 0.49831900  |
| H | 3.42164200  | 6.27908900  | 0.83723200  |

|                       |             |             |             |
|-----------------------|-------------|-------------|-------------|
| C                     | -1.54186600 | -0.13665900 | -1.37753100 |
| H                     | -2.44364500 | -0.74320400 | -1.32035700 |
| H                     | -1.73913900 | 0.73859600  | -2.00890200 |
| N                     | -1.15344400 | 0.31448000  | 0.00219700  |
| S                     | -1.94217700 | 1.76841400  | 0.49386300  |
| O                     | -1.49059600 | 2.00806800  | 1.86624100  |
| O                     | -1.71332700 | 2.81084300  | -0.52848200 |
| C                     | -3.62777300 | 1.24326300  | 0.43050500  |
| C                     | -4.48242600 | 1.80157500  | -0.51868100 |
| C                     | -4.06105900 | 0.26199200  | 1.32806800  |
| C                     | -5.80178600 | 1.35809400  | -0.56797900 |
| H                     | -4.11550800 | 2.56267800  | -1.19731100 |
| C                     | -5.37897300 | -0.16754900 | 1.25566600  |
| H                     | -3.37595200 | -0.14969100 | 2.06051400  |
| C                     | -6.26893500 | 0.37237900  | 0.31093900  |
| H                     | -6.47878500 | 1.78350700  | -1.30181700 |
| H                     | -5.73019200 | -0.93139300 | 1.94252400  |
| C                     | -7.70100300 | -0.08908400 | 0.26568700  |
| H                     | -7.77150000 | -1.17490600 | 0.37587100  |
| H                     | -8.27385600 | 0.35857300  | 1.08600800  |
| H                     | -8.18480200 | 0.19492500  | -0.67120300 |
| N                     | -0.48072800 | -0.89899800 | -1.96814800 |
| C                     | 0.27790900  | 0.37287400  | 0.22472800  |
| H                     | 0.66938300  | -0.61873500 | 0.44926800  |
| H                     | 0.47146800  | 1.02145700  | 1.07865200  |
| 1-INT10               |             |             |             |
| Energy = -3281.798029 |             |             |             |
| S                     | 0.56891500  | 0.97415800  | -3.39188100 |
| O                     | -0.25219600 | 2.11190800  | -3.80364900 |
| O                     | 1.17369900  | 0.04394600  | -4.34717300 |
| C                     | 1.87926200  | 1.59920800  | -2.34873500 |
| C                     | 2.95504200  | 0.76313400  | -2.03691500 |
| C                     | 1.74847500  | 2.85387200  | -1.75748800 |
| C                     | 3.88258700  | 1.17999900  | -1.09270400 |
| H                     | 3.04426400  | -0.20349600 | -2.51630300 |
| C                     | 2.69770300  | 3.26020500  | -0.81869300 |
| H                     | 0.91036600  | 3.48837600  | -2.01865200 |
| C                     | 3.76007500  | 2.42528100  | -0.45762600 |
| H                     | 4.70305000  | 0.52253500  | -0.82725600 |
| H                     | 2.60164400  | 4.23563100  | -0.35167300 |
| C                     | 4.75725800  | 2.83209400  | 0.59696300  |
| H                     | 4.51235600  | 3.80494000  | 1.02989600  |
| H                     | 4.78189000  | 2.09425000  | 1.40667000  |
| H                     | 5.76974000  | 2.89264200  | 0.18242600  |

|   |             |             |             |
|---|-------------|-------------|-------------|
| C | -1.36142800 | 0.69661600  | -1.47205600 |
| H | -2.38519300 | 0.52609500  | -1.80071000 |
| H | -1.18752700 | 1.76943800  | -1.53506400 |
| C | -1.12414000 | 0.19444800  | -0.02816500 |
| H | -1.53035200 | -0.81108900 | 0.06392000  |
| C | -1.85306300 | 1.04862100  | 1.07668200  |
| C | -1.77323900 | 2.53766000  | 0.71948800  |
| C | -0.54695700 | 3.21193500  | 0.82339300  |
| C | -2.87731400 | 3.23226100  | 0.22093700  |
| C | -0.43679400 | 4.55047700  | 0.45476800  |
| H | 0.32566400  | 2.69432400  | 1.20569800  |
| C | -2.76355300 | 4.57098500  | -0.15871600 |
| H | -3.82273000 | 2.72159700  | 0.09734100  |
| C | -1.54626100 | 5.23749700  | -0.04003800 |
| H | 0.51720300  | 5.05815100  | 0.55778300  |
| H | -3.63294600 | 5.08774600  | -0.55248500 |
| H | -1.45969600 | 6.27939500  | -0.33169100 |
| C | -1.28335600 | 0.76285300  | 2.48688600  |
| C | -0.98531800 | -0.55601700 | 2.86335800  |
| C | -1.17647700 | 1.76860000  | 3.45257200  |
| C | -0.53265700 | -0.84808100 | 4.14685800  |
| H | -1.08112800 | -1.36618800 | 2.15308500  |
| C | -0.73842500 | 1.47377700  | 4.74668100  |
| H | -1.43132800 | 2.79002300  | 3.19894800  |
| C | -0.40306700 | 0.16861000  | 5.09626600  |
| H | -0.28700300 | -1.87455000 | 4.40073400  |
| H | -0.66159200 | 2.27253500  | 5.47800400  |
| H | -0.05462100 | -0.05851600 | 6.09906600  |
| C | 0.07592800  | -1.25637700 | -1.98753700 |
| H | 0.71928300  | -1.67788900 | -2.75515000 |
| H | -0.77642900 | -1.92262100 | -1.83565100 |
| N | 0.85652600  | -1.07394800 | -0.72539900 |
| S | 1.34698600  | -2.48465500 | 0.03174000  |
| O | 0.52503500  | -2.78143900 | 1.21697100  |
| O | 1.47552700  | -3.48296500 | -1.03870800 |
| C | 2.97393800  | -2.02891500 | 0.60736700  |
| C | 4.07338300  | -2.29118700 | -0.20800800 |
| C | 3.11870700  | -1.37156600 | 1.82956200  |
| C | 5.33520500  | -1.87093900 | 0.20526500  |
| H | 3.93279900  | -2.82406300 | -1.14151200 |
| C | 4.38533800  | -0.94186600 | 2.21613500  |
| H | 2.25888600  | -1.21648800 | 2.47201600  |
| C | 5.50839800  | -1.17609900 | 1.41037700  |
| H | 6.19906700  | -2.08064500 | -0.41871400 |

|                       |             |             |             |
|-----------------------|-------------|-------------|-------------|
| H                     | 4.50705400  | -0.42827300 | 3.16553600  |
| C                     | 6.86667100  | -0.66825500 | 1.82140500  |
| H                     | 6.99256600  | 0.38102700  | 1.52755900  |
| H                     | 7.00182400  | -0.72012600 | 2.90534300  |
| H                     | 7.66850400  | -1.24008000 | 1.34764700  |
| N                     | -0.42770500 | 0.02416600  | -2.40582900 |
| C                     | 0.39415800  | 0.03202800  | 0.14121900  |
| H                     | 0.92611500  | 0.94067600  | -0.14319000 |
| H                     | 0.66019500  | -0.19527700 | 1.16803900  |
| S                     | -4.41284700 | -0.06268600 | 0.21402300  |
| O                     | -4.52531100 | 0.69200100  | -1.04150300 |
| O                     | -5.57845000 | -0.20961600 | 1.09235000  |
| C                     | -3.74525700 | -1.66537400 | -0.20459300 |
| C                     | -3.62958200 | -2.03137400 | -1.54283400 |
| C                     | -2.98908600 | -3.22907800 | -1.86148100 |
| C                     | -2.44865900 | -4.05076500 | -0.86419500 |
| C                     | -2.62539100 | -3.67787000 | 0.47841700  |
| C                     | -3.28167000 | -2.50102000 | 0.81487200  |
| H                     | -4.00412400 | -1.36965000 | -2.31477700 |
| H                     | -2.87799700 | -3.51161700 | -2.90414300 |
| H                     | -2.21377800 | -4.30444200 | 1.26258600  |
| H                     | -3.38750200 | -2.20142100 | 1.85118400  |
| C                     | -1.63713000 | -5.26802400 | -1.21830200 |
| H                     | -0.57157700 | -5.00932300 | -1.23455100 |
| H                     | -1.77223000 | -6.06597900 | -0.48295400 |
| H                     | -1.90557500 | -5.65551400 | -2.20455500 |
| N                     | -3.25775000 | 0.57835900  | 1.23629800  |
| H                     | -3.70174700 | 0.85393400  | 2.10334700  |
| P                     |             |             |             |
| Energy = -2406.220137 |             |             |             |
| S                     | -0.44566600 | -3.31053700 | -0.81359400 |
| O                     | 0.40078100  | -4.37714300 | -0.27678800 |
| O                     | -1.37168000 | -3.51787400 | -1.92743800 |
| C                     | -1.36813700 | -2.62617500 | 0.55236400  |
| C                     | -2.52697700 | -1.89591200 | 0.28766800  |
| C                     | -0.86975200 | -2.74080400 | 1.85004700  |
| C                     | -3.17393600 | -1.25565500 | 1.33570800  |
| H                     | -2.90279500 | -1.83082200 | -0.72527000 |
| C                     | -1.52768000 | -2.08343300 | 2.88912900  |
| H                     | 0.00967200  | -3.34591300 | 2.03703000  |
| C                     | -2.67804200 | -1.32415100 | 2.64562200  |
| H                     | -4.06895000 | -0.68040700 | 1.13177800  |
| H                     | -1.14110800 | -2.16129900 | 3.90109900  |
| C                     | -3.38872300 | -0.59431500 | 3.75641800  |

|   |             |             |             |
|---|-------------|-------------|-------------|
| H | -2.80774400 | -0.60275500 | 4.68180700  |
| H | -3.57450500 | 0.44795600  | 3.47651200  |
| H | -4.36216200 | -1.05156000 | 3.96826000  |
| C | 1.73052300  | -1.73470500 | -0.41925700 |
| H | 2.67956200  | -1.98753300 | -0.89920600 |
| H | 1.65833400  | -2.36569800 | 0.46991500  |
| C | 1.67336900  | -0.25951400 | -0.06975300 |
| C | 2.77987200  | 0.47460800  | 0.18449800  |
| C | 4.13348900  | -0.14340000 | 0.26006600  |
| C | 4.38803800  | -1.27125000 | 1.05311700  |
| C | 5.20010200  | 0.43166300  | -0.44999200 |
| C | 5.66571100  | -1.82664800 | 1.11598300  |
| H | 3.58420300  | -1.70113800 | 1.64171400  |
| C | 6.47297600  | -0.12836300 | -0.39661800 |
| H | 5.01815200  | 1.31995000  | -1.04621400 |
| C | 6.71020000  | -1.26064800 | 0.38637000  |
| H | 5.84392500  | -2.69782600 | 1.73876800  |
| H | 7.28317500  | 0.32077500  | -0.96279300 |
| H | 7.70475000  | -1.69327000 | 0.43229400  |
| C | 2.75401400  | 1.94486200  | 0.42928900  |
| C | 2.16244900  | 2.83052700  | -0.48165200 |
| C | 3.37345100  | 2.46852100  | 1.57536300  |
| C | 2.15593700  | 4.20285800  | -0.23346500 |
| H | 1.69446500  | 2.45031600  | -1.38074900 |
| C | 3.36763100  | 3.83880400  | 1.82167500  |
| H | 3.85720400  | 1.79112500  | 2.27222800  |
| C | 2.75512900  | 4.71099100  | 0.91853800  |
| H | 1.68189500  | 4.86873600  | -0.94749100 |
| H | 3.84292100  | 4.22734300  | 2.71738800  |
| H | 2.75254200  | 5.77978900  | 1.10991700  |
| C | 0.10799600  | -1.02725100 | -2.14009600 |
| H | -0.65425400 | -1.39725200 | -2.81953800 |
| H | 0.95090300  | -0.63637300 | -2.72237700 |
| N | -0.47299600 | 0.01954900  | -1.26757900 |
| S | -1.32048700 | 1.25877100  | -2.00457200 |
| O | -0.59883000 | 2.53151800  | -1.86335200 |
| O | -1.69501500 | 0.74756600  | -3.32673200 |
| C | -2.80088300 | 1.41157300  | -1.01500500 |
| C | -3.97697800 | 0.81114900  | -1.45919800 |
| C | -2.77049300 | 2.15228000  | 0.16696200  |
| C | -5.13636700 | 0.95053700  | -0.69871300 |
| H | -3.97736100 | 0.26487300  | -2.39554200 |
| C | -3.93482600 | 2.27100500  | 0.91994800  |
| H | -1.85735900 | 2.64965700  | 0.47279100  |

|                                                    |             |             |             |
|----------------------------------------------------|-------------|-------------|-------------|
| C                                                  | -5.13231400 | 1.67221800  | 0.50269800  |
| H                                                  | -6.05933000 | 0.49471800  | -1.04490000 |
| H                                                  | -3.91976700 | 2.85155400  | 1.83804900  |
| C                                                  | -6.37719400 | 1.77904100  | 1.34588500  |
| H                                                  | -6.37028500 | 1.02814700  | 2.14556000  |
| H                                                  | -6.45350800 | 2.76014100  | 1.82308700  |
| H                                                  | -7.27903500 | 1.61578900  | 0.75066800  |
| N                                                  | 0.61970000  | -2.10088700 | -1.32320300 |
| C                                                  | 0.26647600  | 0.29394300  | -0.01192900 |
| H                                                  | -0.27489900 | -0.19279300 | 0.80956300  |
| H                                                  | 0.28045700  | 1.36470200  | 0.17625100  |
| 2-TS4                                              |             |             |             |
| Energy = -5377.055395, Lowest Freq $\nu$ = -237.60 |             |             |             |
| S                                                  | 5.71058800  | -1.56541000 | -1.35859500 |
| O                                                  | 6.15365400  | -0.30968500 | -0.73444400 |
| O                                                  | 6.66477200  | -2.44626900 | -2.03804300 |
| C                                                  | 4.79285000  | -2.46811700 | -0.12447300 |
| C                                                  | 3.88590100  | -3.45760000 | -0.51490300 |
| C                                                  | 4.99593800  | -2.16266500 | 1.21907600  |
| C                                                  | 3.15154000  | -4.11708300 | 0.46166000  |
| H                                                  | 3.71582000  | -3.65777100 | -1.56559500 |
| C                                                  | 4.25928400  | -2.84764200 | 2.18559000  |
| H                                                  | 5.69494800  | -1.38096200 | 1.49225000  |
| C                                                  | 3.31736300  | -3.81616400 | 1.82300600  |
| H                                                  | 2.40831300  | -4.84925400 | 0.16439200  |
| H                                                  | 4.39130200  | -2.59691900 | 3.23370700  |
| C                                                  | 2.44472700  | -4.48720000 | 2.85048300  |
| H                                                  | 1.39063700  | -4.26943400 | 2.64577400  |
| H                                                  | 2.56167500  | -5.57592600 | 2.82256700  |
| H                                                  | 2.67702900  | -4.14608400 | 3.86218600  |
| C                                                  | 3.74795200  | -0.00961500 | -2.39496100 |
| H                                                  | 3.13112900  | 0.05094400  | -3.29820000 |
| H                                                  | 4.39562400  | 0.87074000  | -2.37800300 |
| C                                                  | 3.04249700  | 0.88259400  | -0.11208800 |
| C                                                  | 3.71833800  | 2.16601100  | -0.40399600 |
| C                                                  | 4.88165100  | 2.50682100  | 0.30531800  |
| C                                                  | 3.24347200  | 3.02855000  | -1.40312200 |
| C                                                  | 5.55617800  | 3.68905500  | 0.01463000  |
| H                                                  | 5.27083600  | 1.82143000  | 1.04922000  |
| C                                                  | 3.90760400  | 4.22292500  | -1.67001400 |
| H                                                  | 2.32764000  | 2.79447600  | -1.93242000 |
| C                                                  | 5.06643200  | 4.55339400  | -0.96631500 |
| H                                                  | 6.46549100  | 3.93406700  | 0.55395600  |
| H                                                  | 3.51401400  | 4.89698200  | -2.42385900 |

|    |             |             |             |
|----|-------------|-------------|-------------|
| H  | 5.58674800  | 5.48146200  | -1.18141100 |
| C  | 2.51867600  | 0.65697000  | 1.22101800  |
| C  | 1.94003900  | -0.58340800 | 1.58399900  |
| C  | 2.48243800  | 1.71017900  | 2.16944200  |
| C  | 1.30251200  | -0.74349000 | 2.80776500  |
| H  | 2.00293200  | -1.43820600 | 0.93166400  |
| C  | 1.87603600  | 1.53119200  | 3.40296100  |
| H  | 2.87016700  | 2.68235000  | 1.90225800  |
| C  | 1.26569700  | 0.31291300  | 3.72034400  |
| H  | 0.82550200  | -1.68731800 | 3.04098800  |
| H  | 1.83440700  | 2.35903700  | 4.10261400  |
| H  | 0.74633200  | 0.18714600  | 4.66463000  |
| N  | 4.51298200  | -1.26079300 | -2.52062100 |
| H  | 4.93967000  | -1.39735100 | -3.43317800 |
| C  | 2.89554800  | -0.06458100 | -1.13852800 |
| H  | 2.68708700  | -1.08116700 | -0.83492500 |
| C  | 0.88481100  | 0.05468400  | -1.72854500 |
| H  | 0.74840900  | 1.12764600  | -1.80252300 |
| H  | 1.13974500  | -0.49466500 | -2.62980700 |
| S  | 0.02290200  | -2.32300700 | -0.96601500 |
| O  | 0.25532600  | -2.85938900 | 0.37598200  |
| O  | 0.91501600  | -2.67402700 | -2.07869300 |
| C  | -1.65902700 | -2.63223900 | -1.41246900 |
| C  | -2.56283500 | -2.99771800 | -0.41395600 |
| C  | -2.04191400 | -2.51647600 | -2.75053300 |
| C  | -3.88557500 | -3.23766600 | -0.77210700 |
| H  | -2.23317600 | -3.08076700 | 0.61268900  |
| C  | -3.36640600 | -2.76468600 | -3.08290300 |
| H  | -1.32090300 | -2.23239400 | -3.50617900 |
| C  | -4.30637000 | -3.11766300 | -2.10233400 |
| H  | -4.60180200 | -3.49974000 | -0.00045500 |
| H  | -3.68348300 | -2.66304200 | -4.11596400 |
| C  | -5.75367600 | -3.29296300 | -2.47638300 |
| H  | -6.20889400 | -2.31125100 | -2.64948900 |
| H  | -5.86307300 | -3.87149500 | -3.39846200 |
| H  | -6.31886900 | -3.79086900 | -1.68505400 |
| N  | 0.09898700  | -0.57100100 | -0.83065800 |
| Fe | -1.07475800 | 0.40343600  | 0.41932400  |
| O  | -0.37167700 | 2.00112700  | 1.16158800  |
| S  | -0.08956200 | 3.28938500  | 0.32481100  |
| O  | 1.02399200  | 4.04826900  | 0.87725700  |
| O  | -0.09525200 | 2.94404400  | -1.10484200 |
| C  | -1.63053700 | 4.28628800  | 0.68598900  |
| O  | -2.58326500 | 0.93105700  | -0.57920800 |

|                       |             |             |             |
|-----------------------|-------------|-------------|-------------|
| S                     | -2.82848000 | 1.27870700  | -2.08483200 |
| O                     | -2.92074600 | 2.71394100  | -2.30157500 |
| O                     | -1.98869400 | 0.45449200  | -2.95546200 |
| C                     | -4.58653200 | 0.62432800  | -2.20671200 |
| O                     | -1.64566700 | -0.83859900 | 1.71490500  |
| S                     | -2.39442800 | -0.46588000 | 3.04116200  |
| O                     | -1.81090500 | -1.17999000 | 4.17004600  |
| O                     | -2.64479500 | 0.97078500  | 3.10405900  |
| C                     | -4.02347600 | -1.28192400 | 2.65630600  |
| F                     | -5.44421300 | 1.61470700  | -1.97913400 |
| F                     | -4.78460500 | 0.13709300  | -3.43665600 |
| F                     | -4.79920100 | -0.34825400 | -1.31689300 |
| F                     | -1.54987800 | 4.74695500  | 1.93329600  |
| F                     | -1.67673300 | 5.30457200  | -0.16956000 |
| F                     | -2.71943600 | 3.53606300  | 0.56011000  |
| F                     | -3.84921500 | -2.60343500 | 2.51278000  |
| F                     | -4.51920200 | -0.78450100 | 1.52157300  |
| F                     | -4.87446800 | -1.05622400 | 3.65410900  |
| 2-INT5                |             |             |             |
| Energy = -5377.070393 |             |             |             |
| S                     | 5.59228900  | -1.06589300 | -1.41641200 |
| O                     | 5.68530500  | 0.18089000  | -0.63681200 |
| O                     | 6.76631900  | -1.60984400 | -2.10407100 |
| C                     | 4.87699600  | -2.28575100 | -0.33069700 |
| C                     | 3.95305700  | -3.21944600 | -0.80600100 |
| C                     | 5.25566900  | -2.26213800 | 1.01227000  |
| C                     | 3.37773400  | -4.11188300 | 0.09159700  |
| H                     | 3.63368400  | -3.19664500 | -1.83978500 |
| C                     | 4.68168800  | -3.17855000 | 1.89072400  |
| H                     | 5.95726300  | -1.51506900 | 1.36536000  |
| C                     | 3.72472800  | -4.10170800 | 1.44992200  |
| H                     | 2.61321900  | -4.79507000 | -0.26172800 |
| H                     | 4.95505500  | -3.15254200 | 2.94137700  |
| C                     | 3.03700300  | -5.03852300 | 2.40823800  |
| H                     | 1.95008900  | -4.92439900 | 2.33516900  |
| H                     | 3.26876600  | -6.08371900 | 2.17536200  |
| H                     | 3.33649800  | -4.84949400 | 3.44207000  |
| C                     | 3.49438000  | 0.25745100  | -2.49528300 |
| H                     | 2.91036100  | 0.26335000  | -3.41881000 |
| H                     | 4.04705600  | 1.19661600  | -2.44035900 |
| C                     | 2.82800500  | 0.98843400  | -0.11515600 |
| C                     | 3.33295200  | 2.32595500  | -0.33758000 |
| C                     | 4.28340500  | 2.87518300  | 0.55337300  |
| C                     | 2.90759200  | 3.10013400  | -1.44102800 |



|   |             |             |             |
|---|-------------|-------------|-------------|
| C | 4.76915200  | 4.15996700  | 0.35870600  |
| H | 4.67367700  | 2.25597500  | 1.35147600  |
| C | 3.36811000  | 4.39725100  | -1.60511000 |
| H | 2.15366700  | 2.71889400  | -2.11676500 |
| C | 4.30085000  | 4.92867200  | -0.70974600 |
| H | 5.51580700  | 4.56227100  | 1.03497700  |
| H | 2.99259800  | 4.99931100  | -2.42518200 |
| H | 4.66807500  | 5.94047400  | -0.84982600 |
| C | 2.49223800  | 0.56471300  | 1.20582900  |
| C | 2.26537500  | -0.80501200 | 1.51813300  |
| C | 2.20564800  | 1.53700900  | 2.21552400  |
| C | 1.75936400  | -1.17743100 | 2.74882800  |
| H | 2.49422400  | -1.57976700 | 0.80638200  |
| C | 1.70994000  | 1.14851100  | 3.44613300  |
| H | 2.26010800  | 2.58870500  | 1.97261500  |
| C | 1.47128400  | -0.20551600 | 3.71282400  |
| H | 1.55613100  | -2.22290800 | 2.94299500  |
| H | 1.44278600  | 1.90216600  | 4.17846000  |
| H | 1.01939600  | -0.49975000 | 4.65352500  |
| N | 4.40462600  | -0.89190900 | -2.60633500 |
| H | 4.86241400  | -0.97617300 | -3.50948500 |
| C | 2.55338200  | 0.08473800  | -1.27686700 |
| H | 2.67812800  | -0.94259000 | -0.94516100 |
| C | 1.02039800  | 0.13350600  | -1.69791900 |
| H | 0.66153900  | 1.16017100  | -1.78065500 |
| H | 0.96542100  | -0.32965400 | -2.68479400 |
| S | 0.14886800  | -2.27946800 | -0.93200900 |
| O | 0.47638500  | -2.86922200 | 0.37273100  |
| O | 0.98517700  | -2.59961600 | -2.10190200 |
| C | -1.54000900 | -2.69097600 | -1.28506000 |
| C | -2.38001300 | -3.05436400 | -0.23163700 |
| C | -1.98812300 | -2.66697500 | -2.60684800 |
| C | -3.70163100 | -3.38465200 | -0.51558800 |
| H | -2.00130700 | -3.07429500 | 0.78144300  |
| C | -3.30844000 | -3.01022900 | -2.86717100 |
| H | -1.31582100 | -2.38312600 | -3.40602300 |
| C | -4.18430300 | -3.36349300 | -1.82980300 |
| H | -4.36717300 | -3.64747000 | 0.30031600  |
| H | -3.67333100 | -2.98479600 | -3.88921600 |
| C | -5.63320800 | -3.64585600 | -2.12560800 |
| H | -6.17709400 | -2.70075400 | -2.23729500 |
| H | -5.75224200 | -4.20517000 | -3.05806600 |
| H | -6.10775500 | -4.21040300 | -1.31908700 |
| N | 0.15997400  | -0.57816200 | -0.77191700 |

|                                                     |             |             |             |
|-----------------------------------------------------|-------------|-------------|-------------|
| Fe                                                  | -1.08080800 | 0.35554100  | 0.33652900  |
| O                                                   | -0.33959800 | 1.99972100  | 0.97822100  |
| S                                                   | -0.19066700 | 3.36815400  | 0.25851600  |
| O                                                   | 0.89680800  | 4.13787600  | 0.86163000  |
| O                                                   | -0.22424300 | 3.18653000  | -1.19668200 |
| C                                                   | -1.76696800 | 4.22318100  | 0.77317900  |
| O                                                   | -2.62834100 | 0.85880300  | -0.63063400 |
| S                                                   | -2.86384000 | 1.11703900  | -2.15184800 |
| O                                                   | -3.02297900 | 2.53425700  | -2.44165200 |
| O                                                   | -1.96873200 | 0.29850900  | -2.97247700 |
| C                                                   | -4.58581500 | 0.37366000  | -2.27426700 |
| O                                                   | -1.43710000 | -0.78345200 | 1.82040900  |
| S                                                   | -2.21780000 | -0.32959100 | 3.09330900  |
| O                                                   | -1.60957800 | -0.89401200 | 4.29370800  |
| O                                                   | -2.55493800 | 1.09038900  | 3.02239400  |
| C                                                   | -3.79930200 | -1.26461300 | 2.79441900  |
| F                                                   | -5.49583100 | 1.33358100  | -2.12670000 |
| F                                                   | -4.73323600 | -0.19506400 | -3.47590300 |
| F                                                   | -4.77849800 | -0.55214600 | -1.33019200 |
| F                                                   | -1.73207400 | 4.42591100  | 2.08965800  |
| F                                                   | -1.83012000 | 5.39559600  | 0.14061900  |
| F                                                   | -2.82646300 | 3.48585900  | 0.46308100  |
| F                                                   | -3.55495400 | -2.58246200 | 2.75966900  |
| F                                                   | -4.32700700 | -0.89230400 | 1.62510700  |
| F                                                   | -4.66145700 | -1.00404900 | 3.77520800  |
| 2-TS5                                               |             |             |             |
| Energy = -5376.997942, Lowest Freq $\nu$ = -2232.37 |             |             |             |
| S                                                   | 4.18589300  | -2.21728400 | -1.97245300 |
| O                                                   | 4.95317200  | -1.01777700 | -1.58912800 |
| O                                                   | 4.79951500  | -3.25991600 | -2.79114000 |
| C                                                   | 3.59467800  | -2.98699600 | -0.46819600 |
| C                                                   | 2.31694000  | -3.54383600 | -0.37307700 |
| C                                                   | 4.48518800  | -3.04984100 | 0.60346700  |
| C                                                   | 1.92590600  | -4.13689700 | 0.82346800  |
| H                                                   | 1.60547700  | -3.47588200 | -1.18595900 |
| C                                                   | 4.08263300  | -3.66815100 | 1.78478000  |
| H                                                   | 5.46773300  | -2.59927600 | 0.51850400  |
| C                                                   | 2.79940000  | -4.21341800 | 1.91828500  |
| H                                                   | 0.91698800  | -4.52557300 | 0.91678300  |
| H                                                   | 4.76946100  | -3.70924100 | 2.62516000  |
| C                                                   | 2.34211900  | -4.84329300 | 3.20790600  |
| H                                                   | 2.15024600  | -5.91363200 | 3.07282100  |
| H                                                   | 3.09233500  | -4.73439000 | 3.99522500  |
| H                                                   | 1.40768200  | -4.38565000 | 3.54669900  |

|   |             |             |             |
|---|-------------|-------------|-------------|
| C | 2.55495800  | -0.21668700 | -2.86973400 |
| H | 1.85847300  | -0.11238400 | -3.70259000 |
| H | 3.47294200  | 0.31914600  | -3.11973200 |
| C | 2.88438400  | 0.99862200  | -0.63635900 |
| C | 3.73339700  | 2.07204300  | -1.14065800 |
| C | 5.13295100  | 2.00822400  | -0.96100800 |
| C | 3.16948900  | 3.15957500  | -1.84203200 |
| C | 5.94341300  | 3.01398900  | -1.47207600 |
| H | 5.56116200  | 1.13014700  | -0.49441100 |
| C | 3.98891700  | 4.17827400  | -2.31055700 |
| H | 2.09503100  | 3.25228100  | -1.93543400 |
| C | 5.37401400  | 4.10377400  | -2.13632600 |
| H | 7.02020800  | 2.94526400  | -1.35866600 |
| H | 3.54591500  | 5.03469300  | -2.80735300 |
| H | 6.01006400  | 4.89412500  | -2.52234300 |
| C | 2.99214200  | 0.53882400  | 0.69541800  |
| C | 2.26936800  | -0.59844200 | 1.15866000  |
| C | 3.71039300  | 1.31748600  | 1.65365900  |
| C | 2.26204200  | -0.93431200 | 2.49550100  |
| H | 1.72835800  | -1.22475000 | 0.46650400  |
| C | 3.71493500  | 0.95831600  | 2.98852700  |
| H | 4.17775600  | 2.23964700  | 1.34499100  |
| C | 2.98504100  | -0.15632100 | 3.41107700  |
| H | 1.69015500  | -1.78710100 | 2.83477700  |
| H | 4.23677200  | 1.57616100  | 3.71039600  |
| H | 2.95856200  | -0.41405700 | 4.46559800  |
| N | 2.84901700  | -1.63074000 | -2.76663600 |
| H | 2.07602400  | -2.27026600 | -2.91974400 |
| C | 1.92416600  | 0.45173000  | -1.62192200 |
| H | 1.00266100  | -0.44720400 | -1.08232100 |
| C | 0.57870900  | 1.17038700  | -1.87059500 |
| H | 0.37637300  | 2.05994100  | -1.28021300 |
| H | 0.35788300  | 1.35646200  | -2.92036700 |
| S | -0.74906700 | -1.12641200 | -2.57956800 |
| O | -0.00245600 | -2.36678900 | -2.29849300 |
| O | -0.56585600 | -0.45892600 | -3.87282900 |
| C | -2.46540600 | -1.43244000 | -2.31081100 |
| C | -2.84559200 | -2.40780800 | -1.38803900 |
| C | -3.39032200 | -0.78408500 | -3.13312300 |
| C | -4.19639100 | -2.71771900 | -1.27586000 |
| H | -2.10337500 | -2.90396500 | -0.77782200 |
| C | -4.72928700 | -1.12984500 | -3.01540700 |
| H | -3.05918600 | -0.03138600 | -3.83551400 |
| C | -5.15321500 | -2.08445200 | -2.07941600 |

|                       |             |             |             |
|-----------------------|-------------|-------------|-------------|
| H                     | -4.50902900 | -3.45760400 | -0.54679700 |
| H                     | -5.46284500 | -0.62949500 | -3.63921900 |
| C                     | -6.61920600 | -2.37305000 | -1.90106000 |
| H                     | -7.15856300 | -2.31885900 | -2.85076100 |
| H                     | -6.78741900 | -3.35889400 | -1.46029500 |
| H                     | -7.06163600 | -1.62749300 | -1.22913000 |
| N                     | -0.19885400 | 0.00206900  | -1.32175400 |
| Fe                    | -0.97328500 | 0.36912400  | 0.66843200  |
| O                     | 0.37707900  | 1.67881800  | 1.38035000  |
| S                     | 0.62435200  | 3.18160900  | 1.23724300  |
| O                     | 1.98654900  | 3.53953400  | 1.64935700  |
| O                     | 0.14869100  | 3.69857500  | -0.05630400 |
| C                     | -0.48541000 | 3.88239900  | 2.55414800  |
| O                     | -2.55348300 | 1.50992600  | 0.51963300  |
| S                     | -3.04118600 | 2.26273100  | -0.72809500 |
| O                     | -3.13227200 | 3.70408200  | -0.54036400 |
| O                     | -2.40971600 | 1.74141200  | -1.95389900 |
| C                     | -4.80298500 | 1.64849300  | -0.74532400 |
| O                     | -0.82557800 | -1.69566400 | 0.91368500  |
| S                     | -1.21830800 | -1.82192600 | 2.38676500  |
| O                     | -0.43445000 | -2.79791100 | 3.14214400  |
| O                     | -1.36902100 | -0.44043400 | 2.90771200  |
| C                     | -2.94360400 | -2.50928100 | 2.28867600  |
| F                     | -5.54250000 | 2.34693900  | 0.11556000  |
| F                     | -5.31740300 | 1.78459200  | -1.97537200 |
| F                     | -4.85599000 | 0.35276800  | -0.39922800 |
| F                     | -0.13243100 | 3.36354800  | 3.73652500  |
| F                     | -0.33011200 | 5.20807200  | 2.59217500  |
| F                     | -1.75797600 | 3.58905800  | 2.31045900  |
| F                     | -2.92740000 | -3.66815500 | 1.61199900  |
| F                     | -3.73464100 | -1.64351100 | 1.65157100  |
| F                     | -3.41142200 | -2.72306200 | 3.51527700  |
| 2-INT6                |             |             |             |
| Energy = -5377.068391 |             |             |             |
| S                     | 4.55608100  | -2.46667600 | -1.35702300 |
| O                     | 5.86646900  | -1.82884000 | -1.53679400 |
| O                     | 4.33082400  | -3.86809400 | -1.71765300 |
| C                     | 4.07977600  | -2.21486200 | 0.34395500  |
| C                     | 2.88730500  | -2.77127000 | 0.81671700  |
| C                     | 4.93507100  | -1.51129700 | 1.18709400  |
| C                     | 2.55609300  | -2.60616900 | 2.15815600  |
| H                     | 2.23530500  | -3.31709100 | 0.14469800  |
| C                     | 4.58055600  | -1.35188400 | 2.52652300  |
| H                     | 5.85275700  | -1.09377000 | 0.79224400  |

|   |             |             |             |
|---|-------------|-------------|-------------|
| C | 3.39454500  | -1.89502700 | 3.03317500  |
| H | 1.63258400  | -3.02984700 | 2.53582400  |
| H | 5.23810200  | -0.79495100 | 3.18805500  |
| C | 3.02700100  | -1.73574000 | 4.48572300  |
| H | 3.30597100  | -2.63009000 | 5.05596200  |
| H | 3.54500400  | -0.88413000 | 4.93491100  |
| H | 1.95072800  | -1.59373800 | 4.60447700  |
| C | 3.63366400  | -0.19356000 | -2.52950000 |
| H | 3.32530600  | -0.03190100 | -3.56601800 |
| H | 4.70231600  | 0.00441900  | -2.45762300 |
| C | 3.34735600  | 1.40207000  | -0.57420200 |
| C | 4.78492700  | 1.73027100  | -0.42474000 |
| C | 5.37965700  | 1.73191200  | 0.84886000  |
| C | 5.56777600  | 2.10883000  | -1.52776800 |
| C | 6.72873500  | 2.03782000  | 1.00351400  |
| H | 4.77825300  | 1.47550600  | 1.71318100  |
| C | 6.91639100  | 2.42103500  | -1.37184600 |
| H | 5.10584000  | 2.18840600  | -2.50606400 |
| C | 7.50458700  | 2.37513600  | -0.10756800 |
| H | 7.17499500  | 2.01884000  | 1.99331700  |
| H | 7.50482900  | 2.71022900  | -2.23695900 |
| H | 8.55594900  | 2.61664600  | 0.01389000  |
| C | 2.46157200  | 1.91771600  | 0.51272300  |
| C | 1.94846900  | 1.02175000  | 1.46494200  |
| C | 2.17729700  | 3.28092600  | 0.63810700  |
| C | 1.17190500  | 1.48835500  | 2.52863700  |
| H | 2.21328900  | -0.02846800 | 1.40994800  |
| C | 1.36346600  | 3.73832400  | 1.67474700  |
| H | 2.57015300  | 3.97703100  | -0.09477100 |
| C | 0.86369200  | 2.84583300  | 2.62331000  |
| H | 0.81852600  | 0.79484600  | 3.28258300  |
| H | 1.11484600  | 4.79272700  | 1.73532700  |
| H | 0.23656300  | 3.20473500  | 3.43278200  |
| N | 3.37570300  | -1.61396000 | -2.21480100 |
| H | 3.07999100  | -2.18585500 | -3.00011700 |
| C | 2.82512800  | 0.66516300  | -1.58592100 |
| H | 1.15463100  | -0.91596300 | -0.46352100 |
| C | 1.33193300  | 0.67032300  | -1.80442400 |
| H | 0.91941700  | 1.58597300  | -1.40414000 |
| H | 1.10972300  | 0.63707400  | -2.87195700 |
| S | 0.23148800  | -1.85654000 | -2.28767100 |
| O | 0.62409100  | -3.04489500 | -1.53562600 |
| O | 0.83726100  | -1.50385700 | -3.57457300 |
| C | -1.52205300 | -1.83017900 | -2.46965800 |

|                       |             |             |             |
|-----------------------|-------------|-------------|-------------|
| C                     | -2.27566100 | -2.78787800 | -1.79043400 |
| C                     | -2.10724400 | -0.89591900 | -3.33171100 |
| C                     | -3.65378400 | -2.79551000 | -1.97668600 |
| H                     | -1.78373200 | -3.50437900 | -1.14425300 |
| C                     | -3.48440700 | -0.91521900 | -3.48546100 |
| H                     | -1.49790200 | -0.17315400 | -3.86191400 |
| C                     | -4.27673800 | -1.86203500 | -2.81371900 |
| H                     | -4.25738000 | -3.53041600 | -1.45421300 |
| H                     | -3.96083200 | -0.17662900 | -4.12066200 |
| C                     | -5.77151100 | -1.83700200 | -2.97265800 |
| H                     | -6.05601200 | -1.86383700 | -4.02949400 |
| H                     | -6.24486000 | -2.68101800 | -2.46622900 |
| H                     | -6.16744000 | -0.90901800 | -2.54897600 |
| N                     | 0.55688900  | -0.46882000 | -1.16748800 |
| Fe                    | -1.14530300 | 0.15881700  | 0.11412100  |
| O                     | -0.79191900 | 1.97996000  | -0.00188200 |
| S                     | -1.22373800 | 3.11920900  | -1.00299100 |
| O                     | -0.03129900 | 3.73512100  | -1.57722000 |
| O                     | -2.28704900 | 2.64555500  | -1.88486200 |
| C                     | -1.94067300 | 4.37006700  | 0.22722700  |
| O                     | -2.91556400 | -0.06578000 | -0.45899800 |
| S                     | -4.18596800 | 0.85305600  | -0.26028400 |
| O                     | -3.88511700 | 2.00245400  | 0.58285700  |
| O                     | -4.91139600 | 0.99005900  | -1.51410100 |
| C                     | -5.22631300 | -0.27705300 | 0.79611600  |
| O                     | -0.44834200 | -1.63398800 | 1.04733700  |
| S                     | -1.06725400 | -1.31426100 | 2.40154900  |
| O                     | -0.24047900 | -1.47688000 | 3.58513300  |
| O                     | -1.69936600 | 0.04256400  | 2.16900200  |
| C                     | -2.44249300 | -2.57017500 | 2.55066500  |
| F                     | -4.67081200 | -0.43358800 | 1.99893700  |
| F                     | -6.42671000 | 0.28405300  | 0.93596400  |
| F                     | -5.36693900 | -1.47404000 | 0.21628500  |
| F                     | -1.12929700 | 5.43132700  | 0.24847600  |
| F                     | -3.14100600 | 4.73703400  | -0.19831800 |
| F                     | -2.01624800 | 3.85885800  | 1.44897500  |
| F                     | -1.88389000 | -3.75186900 | 2.80191400  |
| F                     | -3.12054100 | -2.63554800 | 1.40529600  |
| F                     | -3.25099900 | -2.22557200 | 3.54435400  |
| 2-INT7                |             |             |             |
| Energy = -2368.125159 |             |             |             |
| S                     | 1.58377100  | -3.08450800 | -0.29343000 |
| O                     | 2.95382500  | -2.99517400 | -0.80629700 |
| O                     | 0.92796100  | -4.35812700 | 0.00030900  |

|   |             |             |             |
|---|-------------|-------------|-------------|
| C | 1.54254100  | -2.10066200 | 1.20482800  |
| C | 0.45946400  | -2.21973000 | 2.07539000  |
| C | 2.55479500  | -1.17017100 | 1.44041800  |
| C | 0.36953500  | -1.35562900 | 3.16810500  |
| H | -0.31405500 | -2.95596400 | 1.89090300  |
| C | 2.45938400  | -0.33148700 | 2.54566600  |
| H | 3.39337000  | -1.11095300 | 0.75773800  |
| C | 1.36061500  | -0.39702500 | 3.41527500  |
| H | -0.48961200 | -1.42769300 | 3.82756300  |
| H | 3.24233000  | 0.39833200  | 2.73199200  |
| C | 1.25200900  | 0.56144500  | 4.57331700  |
| H | 2.10224300  | 0.45694900  | 5.25594700  |
| H | 1.24905000  | 1.59809000  | 4.21789200  |
| H | 0.33696500  | 0.39478900  | 5.14667100  |
| C | 1.02069300  | -1.07343300 | -2.03647000 |
| H | 0.54973700  | -1.06665900 | -3.02755100 |
| H | 2.09503500  | -1.14848500 | -2.19193200 |
| C | 1.55604200  | 1.15353200  | -0.94529600 |
| C | 2.98614200  | 1.11224100  | -1.35937500 |
| C | 3.99506700  | 1.34495000  | -0.41053600 |
| C | 3.36175200  | 0.90173000  | -2.69399800 |
| C | 5.33776400  | 1.31156200  | -0.77449200 |
| H | 3.71281600  | 1.55067300  | 0.61604600  |
| C | 4.70641700  | 0.87812500  | -3.06205300 |
| H | 2.59275300  | 0.77406800  | -3.44869300 |
| C | 5.69859000  | 1.07256200  | -2.10220400 |
| H | 6.10423100  | 1.47645100  | -0.02348700 |
| H | 4.97680500  | 0.71186900  | -4.10009200 |
| H | 6.74563400  | 1.04877000  | -2.38717900 |
| C | 1.18993800  | 2.35101900  | -0.13340000 |
| C | 0.51521700  | 2.24473500  | 1.09211300  |
| C | 1.56814500  | 3.62919900  | -0.57720100 |
| C | 0.20387400  | 3.38242100  | 1.83667800  |
| H | 0.25135300  | 1.27006000  | 1.47806600  |
| C | 1.25207500  | 4.76525400  | 0.16244100  |
| H | 2.11136600  | 3.72303100  | -1.51203600 |
| C | 0.56767000  | 4.64638500  | 1.37408700  |
| H | -0.31905200 | 3.27569500  | 2.78247700  |
| H | 1.54363400  | 5.74467300  | -0.20431000 |
| H | 0.32771300  | 5.53169800  | 1.95479300  |
| N | 0.60557800  | -2.31968600 | -1.39228100 |
| H | -0.38761200 | -2.53529100 | -1.30316300 |
| C | 0.65406100  | 0.20263200  | -1.29389700 |
| H | -0.61252500 | -0.60654700 | 0.83173900  |

|                                                    |             |             |             |
|----------------------------------------------------|-------------|-------------|-------------|
| C                                                  | -0.82322900 | 0.40376300  | -1.03569100 |
| H                                                  | -1.05229200 | 1.46837500  | -0.96107800 |
| H                                                  | -1.38457800 | 0.00072500  | -1.88572600 |
| S                                                  | -2.54210600 | -1.38442600 | 0.06843000  |
| O                                                  | -2.66243700 | -1.98204300 | 1.40271700  |
| O                                                  | -2.34468100 | -2.26777800 | -1.10155200 |
| C                                                  | -3.94411300 | -0.35181500 | -0.30878300 |
| C                                                  | -4.15197000 | 0.82389000  | 0.41615500  |
| C                                                  | -4.84391000 | -0.76789200 | -1.28700100 |
| C                                                  | -5.27787100 | 1.59113700  | 0.14335400  |
| H                                                  | -3.42938100 | 1.13141200  | 1.16337400  |
| C                                                  | -5.96951100 | 0.01289500  | -1.54260000 |
| H                                                  | -4.65189800 | -1.68086000 | -1.83840900 |
| C                                                  | -6.20290400 | 1.19875000  | -0.83684500 |
| H                                                  | -5.44490400 | 2.51039000  | 0.69750200  |
| H                                                  | -6.67596000 | -0.30312300 | -2.30434300 |
| C                                                  | -7.40758800 | 2.05466100  | -1.13337200 |
| H                                                  | -8.14299700 | 1.51518000  | -1.73487000 |
| H                                                  | -7.89585600 | 2.38498500  | -0.21141400 |
| H                                                  | -7.11975700 | 2.95558800  | -1.68781000 |
| N                                                  | -1.32311000 | -0.25296700 | 0.19518200  |
| 2-TS6                                              |             |             |             |
| Energy = -6290.743415, Lowest Freq $\nu$ = -277.64 |             |             |             |
| S                                                  | 0.88826600  | -2.24869200 | 2.03891300  |
| O                                                  | 1.18603200  | -3.51241500 | 1.37465900  |
| O                                                  | -0.19697900 | -2.08923200 | 3.00417500  |
| C                                                  | 2.37274700  | -1.59704100 | 2.74909100  |
| C                                                  | 2.28262500  | -0.56194500 | 3.68826300  |
| C                                                  | 3.59948100  | -2.14832300 | 2.38020900  |
| C                                                  | 3.45666400  | -0.03446000 | 4.21111000  |
| H                                                  | 1.31470200  | -0.18057000 | 3.99178900  |
| C                                                  | 4.76215700  | -1.61553500 | 2.93295700  |
| H                                                  | 3.62943000  | -2.96427500 | 1.66911600  |
| C                                                  | 4.71174400  | -0.53865500 | 3.82716800  |
| H                                                  | 3.40687200  | 0.79870900  | 4.90323300  |
| H                                                  | 5.72435300  | -2.02153200 | 2.63779900  |
| C                                                  | 5.96553200  | 0.11696200  | 4.33393400  |
| H                                                  | 6.03316700  | 1.12524200  | 3.91124700  |
| H                                                  | 5.94958000  | 0.21807200  | 5.42366500  |
| H                                                  | 6.85857300  | -0.44536800 | 4.05158600  |
| C                                                  | 1.19356200  | -1.21805100 | -0.54721300 |
| H                                                  | 0.63532900  | -0.56545200 | -1.22269900 |
| H                                                  | 1.01746600  | -2.24194600 | -0.86313000 |
| C                                                  | 3.57451900  | -1.75839400 | -1.07056600 |



|   |            |             |             |
|---|------------|-------------|-------------|
| C | 3.22052200 | -3.15986000 | -1.44240400 |
| C | 3.91876700 | -4.22097300 | -0.84454800 |
| C | 2.23715700 | -3.45438100 | -2.39705200 |
| C | 3.59978300 | -5.54136200 | -1.14745100 |
| H | 4.71688000 | -4.00167300 | -0.14133400 |
| C | 1.92018200 | -4.77701700 | -2.70364500 |
| H | 1.70593900 | -2.65024200 | -2.89461000 |
| C | 2.59375700 | -5.82268700 | -2.07461000 |
| H | 4.13500200 | -6.35101800 | -0.66091000 |
| H | 1.13408400 | -4.98267600 | -3.42206000 |
| H | 2.33907700 | -6.85206500 | -2.30645300 |
| C | 5.00995200 | -1.42096200 | -1.29574900 |
| C | 5.78569900 | -0.69215800 | -0.37933400 |
| C | 5.62550500 | -1.87248900 | -2.47841700 |
| C | 7.12396100 | -0.40548900 | -0.64983500 |
| H | 5.33977200 | -0.34261700 | 0.54154200  |
| C | 6.95721700 | -1.57497200 | -2.75095500 |
| H | 5.04513300 | -2.45363200 | -3.18695300 |
| C | 7.71452000 | -0.83999000 | -1.83555100 |
| H | 7.70626200 | 0.15502900  | 0.07623300  |
| H | 7.40672300 | -1.92189300 | -3.67641700 |
| H | 8.75663400 | -0.61647800 | -2.04344200 |
| C | 2.65920900 | -0.86300900 | -0.60952200 |
| H | 3.15140800 | 0.27117500  | 1.66560700  |
| C | 3.00837800 | 0.59574500  | -0.42028300 |
| H | 3.79965400 | 0.87758100  | -1.11768400 |
| H | 2.12757800 | 1.19701100  | -0.64349400 |
| S | 3.42944800 | 2.46635300  | 1.49181300  |
| O | 4.30636600 | 2.55974000  | 2.66543900  |
| O | 2.02222500 | 2.89955900  | 1.63934900  |
| C | 4.13802000 | 3.32195200  | 0.10772900  |
| C | 5.52023900 | 3.25653800  | -0.07954300 |
| C | 3.30510100 | 3.96659800  | -0.80533800 |
| C | 6.07181800 | 3.85647200  | -1.20543400 |
| H | 6.14146100 | 2.74034500  | 0.64333500  |
| C | 3.87946300 | 4.56475900  | -1.92473600 |
| H | 2.23231500 | 3.97535700  | -0.65424200 |
| C | 5.26274600 | 4.51986100  | -2.14140400 |
| H | 7.14468500 | 3.80695800  | -1.36684500 |
| H | 3.24073700 | 5.06400700  | -2.64715000 |
| C | 5.87691700 | 5.18535900  | -3.34608000 |
| H | 5.14997200 | 5.29780900  | -4.15439500 |
| H | 6.24419800 | 6.18661300  | -3.09056500 |
| H | 6.72841100 | 4.61350800  | -3.72584100 |

|    |             |             |             |
|----|-------------|-------------|-------------|
| N  | 3.52001300  | 0.88522800  | 0.94568200  |
| N  | 0.44841300  | -1.08156700 | 0.75762800  |
| H  | -0.49171100 | -1.42436700 | 0.50243900  |
| C  | -0.25382100 | 0.63415900  | 1.36929900  |
| H  | -0.58710100 | 0.19879300  | 2.30524900  |
| H  | 0.66335100  | 1.21941600  | 1.38045000  |
| S  | -1.03629200 | 2.03802500  | -0.75300200 |
| O  | -2.11637100 | 1.52517500  | -1.64272900 |
| O  | 0.35306900  | 2.05594800  | -1.22991900 |
| C  | -1.49147400 | 3.65948300  | -0.19989000 |
| C  | -2.69947300 | 4.20263500  | -0.63507000 |
| C  | -0.62588600 | 4.35702400  | 0.64812900  |
| C  | -3.04495100 | 5.47978500  | -0.19967100 |
| H  | -3.35266900 | 3.64806700  | -1.29524000 |
| C  | -0.99967100 | 5.62745700  | 1.07032800  |
| H  | 0.31068000  | 3.92220100  | 0.97756100  |
| C  | -2.21117800 | 6.20594500  | 0.65913400  |
| H  | -3.98332100 | 5.91224900  | -0.53329800 |
| H  | -0.33877900 | 6.18041100  | 1.73157300  |
| C  | -2.61580400 | 7.56952000  | 1.15673500  |
| H  | -1.74704600 | 8.22052700  | 1.28990400  |
| H  | -3.31050400 | 8.05660000  | 0.46762400  |
| H  | -3.11727200 | 7.49134900  | 2.12891400  |
| N  | -1.25409300 | 1.00461300  | 0.55413800  |
| Fe | -3.03668800 | -0.04274400 | -0.01045300 |
| O  | -1.91038700 | -1.37297000 | -0.84799200 |
| S  | -2.05143600 | -2.54769100 | -1.87843000 |
| O  | -0.92186200 | -3.45614600 | -1.69172900 |
| O  | -3.41227300 | -3.04576900 | -1.98144100 |
| C  | -1.69000600 | -1.60567700 | -3.44266600 |
| O  | -2.74938900 | -0.71056100 | 2.07783800  |
| S  | -3.90216700 | -1.70902000 | 2.07783000  |
| O  | -4.81572200 | -1.66616100 | 3.20507500  |
| O  | -4.47177100 | -1.57948000 | 0.68172400  |
| C  | -3.10732200 | -3.39912000 | 2.10059000  |
| O  | -4.36315800 | 1.51797800  | 0.36011400  |
| S  | -5.22111100 | 1.39415200  | -0.91091600 |
| O  | -5.40120100 | 2.62105500  | -1.67528200 |
| O  | -4.67492700 | 0.17894500  | -1.60704000 |
| C  | -6.91495800 | 0.94291300  | -0.26942500 |
| F  | -4.03984700 | -4.29965100 | 1.80264900  |
| F  | -2.12759300 | -3.45983100 | 1.19227400  |
| F  | -2.61459500 | -3.63919400 | 3.30915200  |
| F  | -1.66573600 | -2.46624000 | -4.46305600 |

|                       |             |             |             |
|-----------------------|-------------|-------------|-------------|
| F                     | -2.61338500 | -0.67836100 | -3.65911700 |
| F                     | -0.48331200 | -1.01751500 | -3.34752600 |
| F                     | -6.84822000 | -0.08806800 | 0.55964800  |
| F                     | -7.41308600 | 2.00266400  | 0.36977500  |
| F                     | -7.68804800 | 0.64098700  | -1.31151600 |
| 2-INT8                |             |             |             |
| Energy = -6290.753533 |             |             |             |
| S                     | 0.84404600  | -2.16312600 | 2.09760400  |
| O                     | 1.07512000  | -3.40108300 | 1.37253400  |
| O                     | -0.20967800 | -1.97201600 | 3.08155100  |
| C                     | 2.35827500  | -1.53376400 | 2.74362800  |
| C                     | 2.32159400  | -0.47792100 | 3.66460000  |
| C                     | 3.55575600  | -2.13699600 | 2.35499400  |
| C                     | 3.52522800  | 0.01484100  | 4.15048900  |
| H                     | 1.37634100  | -0.05224800 | 3.97902500  |
| C                     | 4.74698200  | -1.63732300 | 2.87488600  |
| H                     | 3.54107300  | -2.96547200 | 1.65828300  |
| C                     | 4.75299800  | -0.54285300 | 3.75054000  |
| H                     | 3.52061600  | 0.86381800  | 4.82452800  |
| H                     | 5.68740700  | -2.08260500 | 2.56741900  |
| C                     | 6.03890100  | 0.07718400  | 4.21708300  |
| H                     | 6.13323100  | 1.07079100  | 3.76537400  |
| H                     | 6.04533000  | 0.20888800  | 5.30349600  |
| H                     | 6.90532900  | -0.52493500 | 3.93463900  |
| C                     | 1.13823500  | -1.13697000 | -0.57042100 |
| H                     | 0.60354200  | -0.48229600 | -1.26110400 |
| H                     | 0.92448300  | -2.16271200 | -0.85127100 |
| C                     | 3.48944200  | -1.79578500 | -1.07023500 |
| C                     | 3.08265200  | -3.19458800 | -1.39587100 |
| C                     | 3.75397000  | -4.25894300 | -0.77138700 |
| C                     | 2.09181300  | -3.48717900 | -2.34207300 |
| C                     | 3.39882400  | -5.57724800 | -1.03872400 |
| H                     | 4.56433000  | -4.04410300 | -0.08093000 |
| C                     | 1.74084900  | -4.80875800 | -2.61551500 |
| H                     | 1.58187800  | -2.68398400 | -2.86200700 |
| C                     | 2.38535500  | -5.85517600 | -1.95925200 |
| H                     | 3.91368000  | -6.38813500 | -0.53269800 |
| H                     | 0.94727300  | -5.01019600 | -3.32633700 |
| H                     | 2.10290800  | -6.88283500 | -2.16466200 |
| C                     | 4.93597900  | -1.53055800 | -1.32488600 |
| C                     | 5.76276000  | -0.81422800 | -0.44413100 |
| C                     | 5.51014700  | -2.05245100 | -2.50005800 |
| C                     | 7.11140500  | -0.61275400 | -0.73871400 |
| H                     | 5.35105800  | -0.40506000 | 0.46756000  |

|   |             |             |             |
|---|-------------|-------------|-------------|
| C | 6.85186200  | -1.83735300 | -2.79832100 |
| H | 4.89049600  | -2.62390700 | -3.18248800 |
| C | 7.66129800  | -1.11822600 | -1.91562600 |
| H | 7.73249000  | -0.06022000 | -0.03939600 |
| H | 7.26824500  | -2.23713900 | -3.71783500 |
| H | 8.71128400  | -0.96004400 | -2.14258900 |
| C | 2.61884600  | -0.84435200 | -0.62831700 |
| H | 3.29760000  | 0.25570300  | 1.58171100  |
| C | 3.04559700  | 0.60129500  | -0.48965400 |
| H | 3.83528900  | 0.82132700  | -1.21129800 |
| H | 2.19430200  | 1.24240500  | -0.71474800 |
| S | 3.48493100  | 2.46273900  | 1.45270100  |
| O | 4.43378900  | 2.55055300  | 2.57033800  |
| O | 2.07618300  | 2.82988500  | 1.70760600  |
| C | 4.07084500  | 3.38990900  | 0.05817900  |
| C | 5.44403900  | 3.42057600  | -0.19298200 |
| C | 3.15627200  | 4.01410200  | -0.78961100 |
| C | 5.90315900  | 4.09842900  | -1.31656700 |
| H | 6.12998200  | 2.92185400  | 0.48223800  |
| C | 3.63878800  | 4.68772300  | -1.90894400 |
| H | 2.09332400  | 3.95355600  | -0.59141600 |
| C | 5.01072400  | 4.74243500  | -2.18781800 |
| H | 6.96854800  | 4.12847400  | -1.52541300 |
| H | 2.93568700  | 5.17055200  | -2.58092100 |
| C | 5.52216500  | 5.49633100  | -3.38829800 |
| H | 4.77493900  | 5.53152400  | -4.18531700 |
| H | 5.76560500  | 6.53149900  | -3.12000400 |
| H | 6.43195100  | 5.04042600  | -3.78861500 |
| N | 3.60080900  | 0.89801800  | 0.85809700  |
| N | 0.35363200  | -0.97416900 | 0.73234100  |
| H | -0.55677500 | -1.39767600 | 0.45244400  |
| C | -0.05747600 | 0.44850400  | 1.21087900  |
| H | -0.40025000 | 0.29790800  | 2.23349700  |
| H | 0.82345600  | 1.08784100  | 1.18248400  |
| S | -0.95495900 | 1.99504400  | -0.81267500 |
| O | -2.04776400 | 1.53145400  | -1.72203300 |
| O | 0.42744200  | 2.05049000  | -1.32063300 |
| C | -1.41072800 | 3.60752900  | -0.22049800 |
| C | -2.57542600 | 4.19817600  | -0.70752300 |
| C | -0.59706800 | 4.24639700  | 0.71924100  |
| C | -2.92740800 | 5.46088100  | -0.23521500 |
| H | -3.19570800 | 3.68471400  | -1.42991300 |
| C | -0.97294400 | 5.50488700  | 1.17492700  |
| H | 0.30471400  | 3.77697200  | 1.09380700  |

|                                                     |             |             |             |
|-----------------------------------------------------|-------------|-------------|-------------|
| C                                                   | -2.14163600 | 6.12884200  | 0.71099200  |
| H                                                   | -3.83515600 | 5.92661900  | -0.60694200 |
| H                                                   | -0.34923100 | 6.01066900  | 1.90654600  |
| C                                                   | -2.55495600 | 7.47573200  | 1.24658700  |
| H                                                   | -1.68599300 | 8.10414900  | 1.46247800  |
| H                                                   | -3.19776200 | 8.00683200  | 0.53974800  |
| H                                                   | -3.11690000 | 7.36335000  | 2.18163900  |
| N                                                   | -1.13991100 | 0.92390200  | 0.41817800  |
| Fe                                                  | -2.92919900 | 0.00912300  | -0.03945200 |
| O                                                   | -1.89942900 | -1.47773700 | -0.80890200 |
| S                                                   | -2.08282600 | -2.68505800 | -1.78413100 |
| O                                                   | -0.96441100 | -3.60524900 | -1.57747600 |
| O                                                   | -3.45116800 | -3.16706700 | -1.85578200 |
| C                                                   | -1.72478800 | -1.81336800 | -3.38904900 |
| O                                                   | -2.64262500 | -0.63162400 | 2.07298300  |
| S                                                   | -3.84019300 | -1.57324400 | 2.12076500  |
| O                                                   | -4.73181100 | -1.44764300 | 3.26071900  |
| O                                                   | -4.42266300 | -1.48799000 | 0.73291200  |
| C                                                   | -3.11376600 | -3.28974200 | 2.21791300  |
| O                                                   | -4.25575200 | 1.57748100  | 0.31331600  |
| S                                                   | -5.11977400 | 1.43353100  | -0.95017400 |
| O                                                   | -5.29102500 | 2.64373400  | -1.74319500 |
| O                                                   | -4.59613500 | 0.19537900  | -1.62092700 |
| C                                                   | -6.81779900 | 1.02392800  | -0.29188100 |
| F                                                   | -4.07363700 | -4.17110500 | 1.95262400  |
| F                                                   | -2.12708900 | -3.43041800 | 1.32174000  |
| F                                                   | -2.63169500 | -3.50139600 | 3.43904800  |
| F                                                   | -1.70199500 | -2.71470400 | -4.37431400 |
| F                                                   | -2.64355300 | -0.89178000 | -3.64313600 |
| F                                                   | -0.51438100 | -1.22263800 | -3.32348900 |
| F                                                   | -6.76561400 | 0.03168800  | 0.58405500  |
| F                                                   | -7.30971400 | 2.11606500  | 0.29727700  |
| F                                                   | -7.59297800 | 0.68190200  | -1.32106300 |
| 2-TS7                                               |             |             |             |
| Energy = -6290.704428, Lowest Freq $\nu$ = -1709.63 |             |             |             |
| S                                                   | 0.56233600  | -1.45331600 | 2.11275000  |
| O                                                   | 0.42943100  | -2.83115700 | 1.66472600  |
| O                                                   | -0.31035800 | -0.83390600 | 3.10387500  |
| C                                                   | 2.25068400  | -1.17619500 | 2.59679000  |
| C                                                   | 2.57568900  | -0.05469100 | 3.35933600  |
| C                                                   | 3.22275700  | -2.08793300 | 2.17918900  |
| C                                                   | 3.91511500  | 0.17774500  | 3.66988200  |
| H                                                   | 1.80568200  | 0.63523100  | 3.68275500  |
| C                                                   | 4.55030500  | -1.84660100 | 2.51384800  |

|   |            |             |             |
|---|------------|-------------|-------------|
| H | 2.93470400 | -2.95816900 | 1.60213200  |
| C | 4.91863900 | -0.70371000 | 3.24323300  |
| H | 4.17881900 | 1.06755000  | 4.23081300  |
| H | 5.31736200 | -2.54133900 | 2.18573900  |
| C | 6.37165100 | -0.42566100 | 3.52877300  |
| H | 6.49128000 | 0.40584600  | 4.22731300  |
| H | 6.86732500 | -1.30419300 | 3.95302000  |
| H | 6.90202700 | -0.16945600 | 2.60410100  |
| C | 1.01430700 | -0.98871300 | -0.59626400 |
| H | 0.45740500 | -0.54323500 | -1.42309600 |
| H | 0.78466800 | -2.05048700 | -0.58647800 |
| C | 3.32702600 | -1.73246200 | -1.17837600 |
| C | 2.86130000 | -3.13189800 | -1.39456200 |
| C | 3.53736800 | -4.19424000 | -0.77063600 |
| C | 1.77340300 | -3.42606200 | -2.22917700 |
| C | 3.09844700 | -5.50543600 | -0.93177100 |
| H | 4.40976700 | -3.98277000 | -0.15940200 |
| C | 1.33386900 | -4.73861700 | -2.39067000 |
| H | 1.25682800 | -2.62656200 | -2.74766600 |
| C | 1.98981600 | -5.77993700 | -1.73683100 |
| H | 3.61914600 | -6.31421400 | -0.42813900 |
| H | 0.46404900 | -4.93330900 | -3.00823500 |
| H | 1.64071900 | -6.80105400 | -1.85258200 |
| C | 4.78338400 | -1.52998100 | -1.42616300 |
| C | 5.61422600 | -0.83861400 | -0.53078000 |
| C | 5.36827300 | -2.09783700 | -2.57157500 |
| C | 6.98207300 | -0.71720500 | -0.77144400 |
| H | 5.19588500 | -0.41548200 | 0.37250300  |
| C | 6.73030600 | -1.95858900 | -2.82346000 |
| H | 4.74147600 | -2.65046900 | -3.26347900 |
| C | 7.54501100 | -1.27264000 | -1.91966200 |
| H | 7.60319700 | -0.18664100 | -0.05907000 |
| H | 7.15839100 | -2.39554500 | -3.72041000 |
| H | 8.61115700 | -1.18192100 | -2.10548500 |
| C | 2.48599000 | -0.72946000 | -0.81216300 |
| H | 3.44670800 | 0.62600100  | 1.20608700  |
| C | 2.92732300 | 0.71372900  | -0.83570300 |
| H | 3.88582900 | 0.80656200  | -1.35368400 |
| H | 2.18589300 | 1.30793800  | -1.37763100 |
| S | 3.54374800 | 2.81545600  | 0.76696900  |
| O | 3.48065300 | 3.05297500  | 2.21059100  |
| O | 2.79559200 | 3.63606700  | -0.19180400 |
| C | 5.25669000 | 2.80826700  | 0.27532000  |
| C | 6.23506500 | 2.54384000  | 1.23416500  |

|    |             |             |             |
|----|-------------|-------------|-------------|
| C  | 5.58963600  | 2.98502500  | -1.06908100 |
| C  | 7.56485500  | 2.44773100  | 0.83221900  |
| H  | 5.95202900  | 2.43991500  | 2.27517500  |
| C  | 6.92254500  | 2.87342900  | -1.45274000 |
| H  | 4.81580200  | 3.22172900  | -1.79020600 |
| C  | 7.92594000  | 2.59545500  | -0.51453600 |
| H  | 8.33531700  | 2.25687700  | 1.57397000  |
| H  | 7.18960800  | 3.00323800  | -2.49732200 |
| C  | 9.35517700  | 2.42237200  | -0.95767300 |
| H  | 9.63696600  | 3.17310300  | -1.70164700 |
| H  | 10.04997700 | 2.49359000  | -0.11722700 |
| H  | 9.49196700  | 1.43855100  | -1.42310400 |
| N  | 3.00161100  | 1.24809300  | 0.53888300  |
| N  | 0.31859700  | -0.47972500 | 0.64149700  |
| H  | -0.89800300 | -0.34404800 | 0.12877400  |
| C  | -0.02675800 | 0.98232500  | 0.82213300  |
| H  | -0.23550300 | 1.16198100  | 1.87461900  |
| H  | 0.73962800  | 1.65266900  | 0.44688000  |
| S  | -1.32428800 | 1.68397100  | -1.44614400 |
| O  | -2.64937000 | 1.14911900  | -1.90172200 |
| O  | -0.12525800 | 1.43512900  | -2.25953200 |
| C  | -1.45338100 | 3.42724700  | -1.16387200 |
| C  | -2.70747100 | 4.03875800  | -1.15486600 |
| C  | -0.27805300 | 4.14423000  | -0.92182200 |
| C  | -2.77360700 | 5.40228800  | -0.88267300 |
| H  | -3.60323700 | 3.47100000  | -1.36158900 |
| C  | -0.37563100 | 5.50131700  | -0.63744200 |
| H  | 0.69534200  | 3.67085700  | -0.95316100 |
| C  | -1.61915200 | 6.15010800  | -0.61412900 |
| H  | -3.74349900 | 5.89052000  | -0.87697600 |
| H  | 0.53259900  | 6.05985000  | -0.43213900 |
| C  | -1.70758900 | 7.62890700  | -0.33832600 |
| H  | -1.60720400 | 8.20209400  | -1.26806200 |
| H  | -2.66940100 | 7.89480800  | 0.10807600  |
| H  | -0.91122400 | 7.95675900  | 0.33541200  |
| N  | -1.26955600 | 0.94041400  | 0.03850300  |
| Fe | -3.36533500 | 0.08054500  | -0.02467300 |
| O  | -2.36299900 | -1.46651800 | -0.59396700 |
| S  | -2.44350600 | -2.84990700 | -1.30303300 |
| O  | -1.25624700 | -3.62948300 | -0.96344000 |
| O  | -3.77292100 | -3.43715000 | -1.24507200 |
| C  | -2.17049100 | -2.28467000 | -3.05455500 |
| O  | -2.91899800 | 0.07764300  | 2.03072600  |
| S  | -4.07031500 | -0.84003400 | 2.43461100  |

|                       |             |             |             |
|-----------------------|-------------|-------------|-------------|
| O                     | -4.90980300 | -0.40918500 | 3.53735800  |
| O                     | -4.72225600 | -1.14688800 | 1.10223300  |
| C                     | -3.28729400 | -2.45376400 | 2.95155100  |
| O                     | -4.55764700 | 1.74706600  | 0.21566100  |
| S                     | -5.54402900 | 1.41827500  | -0.91259500 |
| O                     | -5.75237800 | 2.46829700  | -1.89868400 |
| O                     | -5.11138400 | 0.05298600  | -1.37984400 |
| C                     | -7.18290300 | 1.20561000  | -0.04246400 |
| F                     | -4.26211100 | -3.34822700 | 3.10623600  |
| F                     | -2.44010700 | -2.87172000 | 2.01526900  |
| F                     | -2.64524300 | -2.28208100 | 4.10245300  |
| F                     | -2.00941000 | -3.35821600 | -3.83734000 |
| F                     | -3.19738100 | -1.56395100 | -3.48975100 |
| F                     | -1.05056900 | -1.53907200 | -3.12267400 |
| F                     | -7.09108600 | 0.32884600  | 0.94572800  |
| F                     | -7.54692000 | 2.39392200  | 0.44289000  |
| F                     | -8.07763800 | 0.79102200  | -0.93827500 |
| 2-INT9                |             |             |             |
| Energy = -6290.748174 |             |             |             |
| S                     | 0.67438500  | -0.94280800 | 2.42834900  |
| O                     | 0.47856300  | -2.38810200 | 2.33388800  |
| O                     | -0.12605100 | -0.09538000 | 3.31207400  |
| C                     | 2.39943900  | -0.67619400 | 2.81138900  |
| C                     | 2.82229300  | 0.58509700  | 3.23147400  |
| C                     | 3.30906900  | -1.71347200 | 2.60114000  |
| C                     | 4.18671100  | 0.81346700  | 3.41200900  |
| H                     | 2.10379600  | 1.38028800  | 3.39220800  |
| C                     | 4.66468000  | -1.46974000 | 2.79819300  |
| H                     | 2.95201400  | -2.68430000 | 2.27919000  |
| C                     | 5.12578000  | -0.20323500 | 3.18962100  |
| H                     | 4.51936300  | 1.79977100  | 3.71899200  |
| H                     | 5.38049700  | -2.26780000 | 2.62431400  |
| C                     | 6.60337200  | 0.05248800  | 3.34066400  |
| H                     | 6.79975400  | 1.06417100  | 3.70414000  |
| H                     | 7.05779200  | -0.65436300 | 4.04247600  |
| H                     | 7.11716200  | -0.06884700 | 2.38040800  |
| C                     | 0.95710200  | -1.13050800 | -0.26370900 |
| H                     | 0.31451200  | -0.90310400 | -1.12006000 |
| H                     | 0.74650800  | -2.16246900 | 0.00266300  |
| C                     | 3.23174600  | -2.01299800 | -0.84668400 |
| C                     | 2.76696000  | -3.41990300 | -0.69304400 |
| C                     | 3.50374300  | -4.31081300 | 0.10595800  |
| C                     | 1.61005500  | -3.89110500 | -1.33267400 |
| C                     | 3.06438200  | -5.61696200 | 0.30306800  |



|   |             |             |             |
|---|-------------|-------------|-------------|
| H | 4.42156500  | -3.96719700 | 0.57314400  |
| C | 1.16858500  | -5.19842100 | -1.13382500 |
| H | 1.04313100  | -3.23564100 | -1.98451300 |
| C | 1.89078700  | -6.06192600 | -0.31086100 |
| H | 3.63554300  | -6.28816100 | 0.93742000  |
| H | 0.25098000  | -5.52394900 | -1.61103200 |
| H | 1.54391500  | -7.07790400 | -0.14983300 |
| C | 4.67761100  | -1.87387000 | -1.17878300 |
| C | 5.52559500  | -1.01880800 | -0.45878600 |
| C | 5.23441500  | -2.66790100 | -2.19537100 |
| C | 6.88830900  | -0.95884200 | -0.74664300 |
| H | 5.12291200  | -0.41933800 | 0.34723600  |
| C | 6.59136800  | -2.59142100 | -2.49794200 |
| H | 4.59086700  | -3.34776300 | -2.74400800 |
| C | 7.42523400  | -1.73989100 | -1.76924700 |
| H | 7.52453700  | -0.29697300 | -0.17124200 |
| H | 7.00072200  | -3.20474000 | -3.29489200 |
| H | 8.48716600  | -1.69425100 | -1.99240900 |
| C | 2.39918600  | -0.95253800 | -0.69262200 |
| H | 3.23648900  | 0.85413200  | 0.96417200  |
| C | 2.81351000  | 0.45032400  | -1.07236800 |
| H | 3.76259800  | 0.42500200  | -1.61520900 |
| H | 2.05563800  | 0.88662100  | -1.73225200 |
| S | 3.54800900  | 2.84442000  | -0.00676100 |
| O | 3.44309300  | 3.42953000  | 1.33244700  |
| O | 2.91171900  | 3.46020500  | -1.17778600 |
| C | 5.27969100  | 2.65334800  | -0.39378000 |
| C | 6.20790200  | 2.58098100  | 0.64537600  |
| C | 5.67961500  | 2.55161800  | -1.72736400 |
| C | 7.55419800  | 2.40340100  | 0.33741900  |
| H | 5.87564800  | 2.68981400  | 1.67089600  |
| C | 7.02816000  | 2.36308400  | -2.01503800 |
| H | 4.94466400  | 2.64354000  | -2.51854100 |
| C | 7.98258900  | 2.28328300  | -0.99239600 |
| H | 8.28510900  | 2.36163600  | 1.14002200  |
| H | 7.34655400  | 2.27990500  | -3.04995200 |
| C | 9.43201500  | 2.03256800  | -1.31879200 |
| H | 9.73922900  | 2.57532400  | -2.21722000 |
| H | 10.08780600 | 2.32960000  | -0.49645200 |
| H | 9.60240400  | 0.96591600  | -1.51119200 |
| N | 2.90079100  | 1.31414100  | 0.12279200  |
| N | 0.51146700  | -0.30314300 | 0.87442600  |
| H | -1.24380900 | -0.18739700 | -0.62209100 |
| C | -0.14985400 | 0.96238300  | 0.68170500  |

|    |             |             |             |
|----|-------------|-------------|-------------|
| H  | -0.51498300 | 1.32325600  | 1.64071500  |
| H  | 0.53194000  | 1.69509400  | 0.24184000  |
| S  | -1.48523700 | 1.76443300  | -1.60662500 |
| O  | -2.89841100 | 1.42069100  | -1.93884400 |
| O  | -0.42220800 | 1.50984900  | -2.57877100 |
| C  | -1.35238000 | 3.39560300  | -0.95831300 |
| C  | -2.43844300 | 3.96995300  | -0.29107900 |
| C  | -0.11468100 | 4.03511100  | -1.06121800 |
| C  | -2.25865700 | 5.22064600  | 0.28935800  |
| H  | -3.38752600 | 3.45363500  | -0.22463400 |
| C  | 0.03848600  | 5.27838500  | -0.45860700 |
| H  | 0.71860800  | 3.57240200  | -1.57363300 |
| C  | -1.02563200 | 5.88870400  | 0.22043100  |
| H  | -3.09029700 | 5.68408000  | 0.81138200  |
| H  | 1.00648700  | 5.76604200  | -0.51056000 |
| C  | -0.85596300 | 7.24760900  | 0.84713200  |
| H  | -1.11631500 | 8.03590600  | 0.13040600  |
| H  | -1.50525400 | 7.36952800  | 1.71809500  |
| H  | 0.17840100  | 7.41516000  | 1.15820400  |
| N  | -1.31837300 | 0.75811800  | -0.22750700 |
| Fe | -3.58294500 | 0.06117500  | -0.13570100 |
| O  | -2.62302100 | -1.38553400 | -0.96493800 |
| S  | -2.75906100 | -2.70688200 | -1.79006500 |
| O  | -1.73061100 | -3.65101600 | -1.36229700 |
| O  | -4.14422000 | -3.11735000 | -1.95011900 |
| C  | -2.17071400 | -2.02907400 | -3.41861200 |
| O  | -2.91657200 | 0.01700100  | 1.84564600  |
| S  | -3.96921200 | -0.98123900 | 2.32569100  |
| O  | -4.70702700 | -0.65988800 | 3.53147000  |
| O  | -4.75525000 | -1.24355600 | 1.04866900  |
| C  | -3.02454100 | -2.56286200 | 2.63815600  |
| O  | -4.70396000 | 1.74921000  | 0.32183400  |
| S  | -5.74988800 | 1.51979300  | -0.77913600 |
| O  | -6.01118400 | 2.63340100  | -1.67180000 |
| O  | -5.32972500 | 0.18934300  | -1.36740800 |
| C  | -7.33551600 | 1.20018300  | 0.15547100  |
| F  | -3.90825500 | -3.53200500 | 2.86832800  |
| F  | -2.29639600 | -2.85928700 | 1.56795600  |
| F  | -2.24601000 | -2.39372500 | 3.69828200  |
| F  | -2.12491900 | -3.00960100 | -4.31958900 |
| F  | -2.97882000 | -1.06316900 | -3.84396600 |
| F  | -0.93125700 | -1.52497400 | -3.25881600 |
| F  | -7.16166700 | 0.25487700  | 1.06735800  |
| F  | -7.69979900 | 2.33763800  | 0.74736800  |

|   |             |            |             |
|---|-------------|------------|-------------|
| F | -8.26498900 | 0.82600200 | -0.72009300 |
|---|-------------|------------|-------------|
